# Supplementary material for: SLIMM: species level identification of microorganisms from metagenomes
Source: PeerJ. 2017 Mar 28;5:e3138. doi: 10.7717/peerj.3138 (PMC5372838; doi:10.7717/peerj.3138)
Supplement: Data S1 [file peerj-05-3138-s007.xlsx]

## Sheet: Datasets
Dataset	Dataset	Number of Reads	Read Length	Paired	Number of Species	Abandunce Distribution	Type	Discription	Column1
MG01	AB-64	109.63 M	75	Yes	64	even	Mock Community	mock community dataset from the Human Microbiome Project (HMP) containing genomes of 22 microorganisms (DOI:10.1186/1471-2105-15-S9-S14)	SRR606249
MG02	HMP-mock-ill-even	6.56 M	75	No	21	even	Mock Community	mock community dataset from the Human Microbiome Project (HMP) containing genomes of 22 microorganisms (DOI: 10.1038/nature06244)	SRR172903
MG03	HMP-mock-ill-stag	7.93 M	75	No	21	staggered	Mock Community	mock community dataset from the Human Microbiome Project (HMP) containing genomes of 22 microorganisms (DOI: 10.1038/nature06244)	SRR172902
MG04	gut-microbiome	18.38 M	100	Yes	40	staggered	Simulated (mimicking)	simulated datasets resembling a metagenome obtained from human gut sample during the HMP
MG05	LL-S1-results	18.38 M	100	Yes	134	staggered	Simulated (mimicking)	simulated datasets resembling a a freshwater metagenome dataset from Lake Lanier (DOI: 10.1128/AEM.00107-11)
MG06	random-0050-0001	18.38 M	100	Yes	50	staggered	Simulated (random)	randomly created microbiomes (50 organisms, no difference in abundance )
MG07	random-0050-0100	18.38 M	100	Yes	50	staggered	Simulated (random)	randomly created microbiomes (50 organisms, abundance range 1 to 100)
MG08	random-0050-1000	18.38 M	100	Yes	50	staggered	Simulated (random)	randomly created microbiomes (50 organisms, abundance range 1 to 1000)
MG09	random-0200-0001	18.38 M	100	Yes	200	even	Simulated (random)	randomly created microbiomes (200 organisms, no difference in abundance )
MG10	random-0200-0100	18.38 M	100	Yes	200	staggered	Simulated (random)	randomly created microbiomes (200 organisms, abundance range 1 to 100)
MG11	random-0200-1000	18.38 M	100	Yes	200	staggered	Simulated (random)	randomly created microbiomes (200 organisms, abundance range 1 to 1000)
MG12	random-0500-0001	18.38 M	100	Yes	500	even	Simulated (random)	randomly created microbiomes (500 organisms, no difference in abundance )
MG13	random-0500-0100	18.38 M	100	Yes	500	staggered	Simulated (random)	randomly created microbiomes (500 organisms, abundance range 1 to 100)
MG14	random-0500-1000	18.38 M	100	Yes	500	staggered	Simulated (random)	randomly created microbiomes (500 organisms, abundance range 1 to 1000)	https://data.cami-challenge.org/participate
MG15	M1-S001	7.44 M	100	Yes	199	staggered	Simulated (CAMI Challenge)	Medium complexity CAMI (The Critical Assessment of Metagenome Interpretation) challenge toy datasets which are publicly available at https://data.cami-challenge.org/participate.	https://data.cami-challenge.org/participate
MG16	M1-S002	7.43 M	100	Yes	199	staggered	Simulated (CAMI Challenge)	Medium complexity CAMI (The Critical Assessment of Metagenome Interpretation) challenge toy datasets which are publicly available at https://data.cami-challenge.org/participate.	https://data.cami-challenge.org/participate
MG17	M2-S001	149.14 M	100	Yes	199	staggered	Simulated (CAMI Challenge)	Medium complexity CAMI (The Critical Assessment of Metagenome Interpretation) challenge toy datasets which are publicly available at https://data.cami-challenge.org/participate.	https://data.cami-challenge.org/participate
MG18	M2-S002	149.03 M	100	Yes	199	staggered	Simulated (CAMI Challenge)	Medium complexity CAMI (The Critical Assessment of Metagenome Interpretation) challenge toy datasets which are publicly available at https://data.cami-challenge.org/participate.	https://data.cami-challenge.org/participate
Dataset &	Dataset &	Number of Reads &	Read Length &	Paired &	Number of Species &	Abandunce Distribution &	Type \\ \hline
MG01 &	AB-64 &	109.63 M &	75 &	Yes &	64 &	even &	Mock Community \\ \hline
MG02 &	HMP-mock-ill-even &	6.56 M &	75 &	No &	21 &	even &	Mock Community \\ \hline
MG03 &	HMP-mock-ill-stag &	7.93 M &	75 &	No &	21 &	staggered &	Mock Community \\ \hline
MG04 &	gut-microbiome &	18.38 M &	100 &	Yes &	40 &	staggered &	Simulated (mimicking) \\ \hline
MG05 &	LL-S1-results &	18.38 M &	100 &	Yes &	134 &	staggered &	Simulated (mimicking) \\ \hline
MG06 &	random-0050-0001 &	18.38 M &	100 &	Yes &	50 &	staggered &	Simulated (random) \\ \hline
MG07 &	random-0050-0100 &	18.38 M &	100 &	Yes &	50 &	staggered &	Simulated (random) \\ \hline
MG08 &	random-0050-1000 &	18.38 M &	100 &	Yes &	50 &	staggered &	Simulated (random) \\ \hline
MG09 &	random-0200-0001 &	18.38 M &	100 &	Yes &	200 &	even &	Simulated (random) \\ \hline
MG10 &	random-0200-0100 &	18.38 M &	100 &	Yes &	200 &	staggered &	Simulated (random) \\ \hline
MG11 &	random-0200-1000 &	18.38 M &	100 &	Yes &	200 &	staggered &	Simulated (random) \\ \hline
MG12 &	random-0500-0001 &	18.38 M &	100 &	Yes &	500 &	even &	Simulated (random) \\ \hline
MG13 &	random-0500-0100 &	18.38 M &	100 &	Yes &	500 &	staggered &	Simulated (random) \\ \hline
MG14 &	random-0500-1000 &	18.38 M &	100 &	Yes &	500 &	staggered &	Simulated (random) \\ \hline
MG15 &	M1-S001 &	7.44 M &	100 &	Yes &	199 &	staggered &	Simulated (CAMI Challenge) \\ \hline
MG16 &	M1-S002 &	7.43 M &	100 &	Yes &	199 &	staggered &	Simulated (CAMI Challenge) \\ \hline
MG17 &	M2-S001 &	149.14 M &	100 &	Yes &	199 &	staggered &	Simulated (CAMI Challenge) \\ \hline
MG18 &	M2-S002 &	149.03 M &	100 &	Yes &	199 &	staggered &	Simulated (CAMI Challenge) \\ \hline

## Sheet: DS
Dataset	Dataset	Number of Reads (Single)	Number of Reads (total)	Read Length	Paired	Number of Species	Abandunce Distribution	Type	Discription	Column1
MG01	AB-64	54814748	109629496	75	Yes	64	even	Mock Community	mock community dataset from the Human Microbiome Project (HMP) containing genomes of 22 microorganisms (DOI:10.1186/1471-2105-15-S9-S14)	SRR606249
MG02	HMP-mock-ill-even	6562065	6562065	75	No	21	even	Mock Community	mock community dataset from the Human Microbiome Project (HMP) containing genomes of 22 microorganisms (DOI: 10.1038/nature06244)	SRR172902
MG03	HMP-mock-ill-stag	7932819	7932819	75	No	21	staggered	Mock Community	mock community dataset from the Human Microbiome Project (HMP) containing genomes of 22 microorganisms (DOI: 10.1038/nature06244)	SRR172903
MG04	gut-microbiome	9187586	18375172	100	Yes	40	staggered	Simulated (mimicking)	simulated datasets resembling a metagenome obtained from human gut sample during the HMP
MG05	LL-S1-results	9187586	18375172	100	Yes	134	staggered	Simulated (mimicking)	simulated datasets resembling a a freshwater metagenome dataset from Lake Lanier (DOI: 10.1128/AEM.00107-11)
MG06	random-0050-0001	9187586	18375172	100	Yes	50	staggered	Simulated (random)	randomly created microbiomes (50 organisms, no difference in abundance )
MG07	random-0050-0100	9187586	18375172	100	Yes	50	staggered	Simulated (random)	randomly created microbiomes (50 organisms, abundance range 1 to 100)
MG08	random-0050-1000	9187586	18375172	100	Yes	50	staggered	Simulated (random)	randomly created microbiomes (50 organisms, abundance range 1 to 1000)
MG09	random-0200-0001	9187586	18375172	100	Yes	200	even	Simulated (random)	randomly created microbiomes (200 organisms, no difference in abundance )
MG10	random-0200-0100	9187586	18375172	100	Yes	200	staggered	Simulated (random)	randomly created microbiomes (200 organisms, abundance range 1 to 100)
MG11	random-0200-1000	9187586	18375172	100	Yes	200	staggered	Simulated (random)	randomly created microbiomes (200 organisms, abundance range 1 to 1000)
MG12	random-0500-0001	9187586	18375172	100	Yes	500	even	Simulated (random)	randomly created microbiomes (500 organisms, no difference in abundance )
MG13	random-0500-0100	9187586	18375172	100	Yes	500	staggered	Simulated (random)	randomly created microbiomes (500 organisms, abundance range 1 to 100)
MG14	random-0500-1000	9187586	18375172	100	Yes	500	staggered	Simulated (random)	randomly created microbiomes (500 organisms, abundance range 1 to 1000)	https://data.cami-challenge.org/participate
MG15	M1-S001	3719013	7438026	100	Yes	199	staggered	Simulated (CAMI Challenge)	Medium complexity CAMI (The Critical Assessment of Metagenome Interpretation) challenge toy datasets which are publicly available at https://data.cami-challenge.org/participate.	https://data.cami-challenge.org/participate
MG16	M1-S002	3717085	7434170	100	Yes	199	staggered	Simulated (CAMI Challenge)	Medium complexity CAMI (The Critical Assessment of Metagenome Interpretation) challenge toy datasets which are publicly available at https://data.cami-challenge.org/participate.	https://data.cami-challenge.org/participate
MG17	M2-S001	74568473	149136946	100	Yes	199	staggered	Simulated (CAMI Challenge)	Medium complexity CAMI (The Critical Assessment of Metagenome Interpretation) challenge toy datasets which are publicly available at https://data.cami-challenge.org/participate.	https://data.cami-challenge.org/participate
MG18	M2-S002	74515362	149030724	100	Yes	199	staggered	Simulated (CAMI Challenge)	Medium complexity CAMI (The Critical Assessment of Metagenome Interpretation) challenge toy datasets which are publicly available at https://data.cami-challenge.org/participate.	https://data.cami-challenge.org/participate

## Sheet: Precision_Recall_F1
Dataset		Precision				Recall				F1
Type	Dataset	SLIMM	Kraken	GOTTCHA	mOTUs	SLIMM	Kraken	GOTTCHA	mOTUs	SLIMM	Kraken	GOTTCHA	mOTUs
\multirow{3}{*}{Mock}	MG01	0.892308	0.626374	0.980769	1	0.935484	0.919355	0.822581	0.806452	0.913386	0.745098	0.894737	0.892857
	MG02	0.954545	0.84	1	1	1	1	0.952381	0.857143	0.976744	0.913043	0.97561	0.923077
	MG03	0.952381	0.689655	1	1	0.952381	0.952381	0.857143	0.428571	0.952381	0.8	0.923077	0.6
\multirow{2}{*}{Mimic.Sim}	MG04	1	0.425	0.6	0.947368	1	1	0.617647	0.529412	1	0.596491	0.608696	0.679245
	MG05	1	0.664975	0.871429	0.962963	1	1	0.465649	0.198473	1	0.79878	0.606965	0.329114
\multirow{9}{*}{Rand.Sim}	MG06	0.978261	0.435185	0.689655	0.871795	0.9375	0.979167	0.833333	0.708333	0.957447	0.602564	0.754717	0.781609
	MG07	0.978261	0.435185	0.696429	0.909091	0.9375	0.979167	0.8125	0.625	0.957447	0.602564	0.75	0.740741
	MG08	0.978261	0.429907	0.714286	0.882353	0.9375	0.958333	0.833333	0.625	0.957447	0.593548	0.769231	0.731707
	MG09	0.992908	0.721951	0.839623	0.928571	0.921053	0.973684	0.585526	0.342105	0.955631	0.829132	0.689922	0.5
	MG10	0.992958	0.717822	0.794872	0.957447	0.927632	0.953947	0.407895	0.296053	0.959184	0.819209	0.53913	0.452261
	MG11	0.992806	0.716418	0.805825	0.946429	0.907895	0.947368	0.546053	0.348684	0.948454	0.815864	0.65098	0.509615
	MG12	0.985507	0.828402	0.733333	0.977273	0.931507	0.958904	0.0376712	0.14726	0.957746	0.888889	0.0716612	0.255952
	MG13	0.985507	0.823708	0.809524	0.981132	0.931507	0.928082	0.0582192	0.178082	0.957746	0.872786	0.108626	0.301449
	MG14	0.985075	0.985714	0.8	0.981132	0.90411	0.945205	0.0547945	0.178082	0.942857	0.965035	0.102564	0.301449
\multirow{4}{*}{CAMI}	MG15	0.926136	0.764423	0.739726	0.8	0.819095	0.798995	0.271357	0.120603	0.869333	0.781327	0.397059	0.209607
	MG16	0.837696	0.702703	0.688312	0.846154	0.80402	0.78392	0.266332	0.110553	0.820513	0.741093	0.384058	0.195556
	MG17	0.930233	0.760766	0.453125	0.736842	0.80402	0.798995	0.145729	0.140704	0.862534	0.779412	0.220532	0.236287
	MG18	0.822335	0.699552	0.483871	0.777778	0.81407	0.78392	0.150754	0.140704	0.818182	0.739336	0.229885	0.238298
Latex Table
Type &	Dataset &	SLIMM &	Kraken &	GOTTCHA &	mOTUs &	SLIMM &	Kraken &	GOTTCHA &	mOTUs &	SLIMM &	Kraken &	GOTTCHA &	mOTUs \\ \hline
\multirow{3}{*}{Mock} &	MG01 &	0.8923 &	0.6264 &	0.9808 &	\textbf{1.0000} &	\textbf{0.9355} &	0.9194 &	0.8226 &	0.8065 &	\textbf{0.9134} &	0.7451 &	0.8947 &	0.8929 \\ \cline{2-14}
&	MG02 &	0.9545 &	0.8400 &	\textbf{1.0000} &	\textbf{1.0000} &	\textbf{1.0000} &	\textbf{1.0000} &	0.9524 &	0.8571 &	\textbf{0.9767} &	0.9130 &	0.9756 &	0.9231 \\ \cline{2-14}
&	MG03 &	0.9524 &	0.6897 &	\textbf{1.0000} &	\textbf{1.0000} &	\textbf{0.9524} &	\textbf{0.9524} &	0.8571 &	0.4286 &	\textbf{0.9524} &	0.8000 &	0.9231 &	0.6000 \\ \hline
\multirow{2}{*}{Mimic.Sim} &	MG04 &	\textbf{1.0000} &	0.4250 &	0.6000 &	0.9474 &	\textbf{1.0000} &	\textbf{1.0000} &	0.6176 &	0.5294 &	\textbf{1.0000} &	0.5965 &	0.6087 &	0.6792 \\ \cline{2-14}
&	MG05 &	\textbf{1.0000} &	0.6650 &	0.8714 &	0.9630 &	\textbf{1.0000} &	\textbf{1.0000} &	0.4656 &	0.1985 &	\textbf{1.0000} &	0.7988 &	0.6070 &	0.3291 \\ \hline
\multirow{9}{*}{Rand.Sim} &	MG06 &	\textbf{0.9783} &	0.4352 &	0.6897 &	0.8718 &	0.9375 &	\textbf{0.9792} &	0.8333 &	0.7083 &	\textbf{0.9574} &	0.6026 &	0.7547 &	0.7816 \\ \cline{2-14}
&	MG07 &	\textbf{0.9783} &	0.4352 &	0.6964 &	0.9091 &	0.9375 &	\textbf{0.9792} &	0.8125 &	0.6250 &	\textbf{0.9574} &	0.6026 &	0.7500 &	0.7407 \\ \cline{2-14}
&	MG08 &	\textbf{0.9783} &	0.4299 &	0.7143 &	0.8824 &	0.9375 &	\textbf{0.9583} &	0.8333 &	0.6250 &	\textbf{0.9574} &	0.5935 &	0.7692 &	0.7317 \\ \cline{2-14}
&	MG09 &	\textbf{0.9929} &	0.7220 &	0.8396 &	0.9286 &	0.9211 &	\textbf{0.9737} &	0.5855 &	0.3421 &	\textbf{0.9556} &	0.8291 &	0.6899 &	0.5000 \\ \cline{2-14}
&	MG10 &	\textbf{0.9930} &	0.7178 &	0.7949 &	0.9574 &	0.9276 &	\textbf{0.9539} &	0.4079 &	0.2961 &	\textbf{0.9592} &	0.8192 &	0.5391 &	0.4523 \\ \cline{2-14}
&	MG11 &	\textbf{0.9928} &	0.7164 &	0.8058 &	0.9464 &	0.9079 &	\textbf{0.9474} &	0.5461 &	0.3487 &	\textbf{0.9485} &	0.8159 &	0.6510 &	0.5096 \\ \cline{2-14}
&	MG12 &	\textbf{0.9855} &	0.8284 &	0.7333 &	0.9773 &	0.9315 &	\textbf{0.9589} &	0.0377 &	0.1473 &	\textbf{0.9577} &	0.8889 &	0.0717 &	0.2560 \\ \cline{2-14}
&	MG13 &	\textbf{0.9855} &	0.8237 &	0.8095 &	0.9811 &	\textbf{0.9315} &	0.9281 &	0.0582 &	0.1781 &	\textbf{0.9577} &	0.8728 &	0.1086 &	0.3014 \\ \cline{2-14}
&	MG14 &	0.9851 &	\textbf{0.9857} &	0.8000 &	0.9811 &	0.9041 &	\textbf{0.9452} &	0.0548 &	0.1781 &	0.9429 &	\textbf{0.9650} &	0.1026 &	0.3014 \\ \hline
\multirow{4}{*}{CAMI} &	MG15 &	\textbf{0.9261} &	0.7644 &	0.7397\* &	0.8000\* &	\textbf{0.8191} &	0.7990 &	0.2714* &	0.1206* &	\textbf{0.8693} &	0.7813 &	0.3971* &	0.2096* \\ \cline{2-14}
&	MG16 &	0.8377 &	0.7027 &	0.6883\* &	\textbf{0.8462}\* &	\textbf{0.8040} &	0.7839 &	0.2663* &	0.1106* &	\textbf{0.8205} &	0.7411 &	0.3841* &	0.1956* \\ \cline{2-14}
&	MG17 &	\textbf{0.9302} &	0.7608 &	0.4531\* &	0.7368\* &	\textbf{0.8040} &	0.7990 &	0.1457* &	0.1407* &	\textbf{0.8625} &	0.7794 &	0.2205* &	0.2363* \\ \cline{2-14}
&	MG18 &	\textbf{0.8223} &	0.6996 &	0.4839\* &	0.7778\* &	\textbf{0.8141} &	0.7839 &	0.1508* &	0.1407* &	\textbf{0.8182} &	0.7393 &	0.2299* &	0.2383* \\ \cline{2-14}

## Sheet: run time and Memory
Run Time (Seconds)
Dataset	Yara-S2	Bowtie2	SLIMM	kraken	GOTTCHA	mOTUs
AB-64	1403	1869	4	359	8428	6551
gut-microbiome	306	344	14	314	1813	1289
HMP-mock-ill-even	93	474	100	68	334	211
HMP-mock-ill-stag	160	893	249	74	334	288
LL-S1-results	308	406	19	198	1979	1261
random-0050-0001	373	710	50	200	1971	1286
random-0050-0100	360	674	45	201	1889	1319
random-0050-1000	368	737	53	200	1925	1285
random-0200-0001	394	723	53	193	2052	1291
random-0200-0100	424	720	54	200	2035	1336
random-0200-1000	450	726	54	196	1937	1308
random-0500-0001	414	746	61	198	2052	1300
random-0500-0100	438	792	63	204	1917	1332
random-0500-1000	418	736	61	197	2007	1315
SUM	5909	10550	880	2802	30673	21372
Average	422.071	753.571	62.8571	200.143	2190.93	1526.57
Memory GB
Dataset	Yara-S2	SLIMM
AB-64	32.8697	11.6941
gut-microbiome	33.0233	1.63662
HMP-mock-ill-even	32.7319	6.18192
HMP-mock-ill-stag	32.7277	6.33004
LL-S1-results	33.0228	1.83562
random-0050-0001	33.5519	3.77944
random-0050-0100	33.4766	3.03581
random-0050-1000	33.659	3.80388
random-0200-0001	33.946	4.7668
random-0200-0100	34.374	4.96302
random-0200-1000	33.6264	5.89879
random-0500-0001	34.5146	6.84843
random-0500-0100	35.2431	6.52821
random-0500-1000	34.5603	6.02191
SUM	471.327	73.3246
Average	33.6662	5.23747

## Sheet: |real-predicted abundance|
Dataset	Method	STDDEV	MEAN	Variance	Q1	Q2(median)	Q3
random-0500-1000	SLIMM	0.00201511	0.000730103	4.06065e-06	1.61473e-05	3.84509e-05	0.000164339
	SLIMM-NF	0.00205171	0.000916983	4.20952e-06	2.16494e-05	6.34277e-05	0.000816541
	kraken	0.00241381	0.0011616	5.82647e-06	0.000184754	0.000424593	0.000653984
	GOTTCHA	0.00249972	0.00205567	6.24859e-06	0.000744479	0.00175044	0.00250801
	mOTUs	0.00528848	0.00273473	2.7968e-05	0.000431383	0.00106841	0.00239189
M1-S001	SLIMM	0.00431905	0.000957943	1.86542e-05	6.94761e-06	4.13319e-05	0.000284918
	SLIMM-NF	0.00552954	0.00193985	3.05758e-05	3.67324e-05	0.000223402	0.00152642
	kraken	0.00477362	0.00218341	2.27874e-05	0.000123681	0.000442771	0.00182977

## Sheet: Profiles of Datasets
Species Level Taxonomic Profiles of the Different datasets used in the paper
AB-64				CAMI S001				CAMI S002				gut-microbiome				LL-S1-results				HMP-even				HMP-stag					rand-0050-0001			rand-0050-0100			rand-0050-1000			rand-0200-0001			rand-0200-0100			rand-0200-1000			rand-0500-0001
Relative Ab	Taxonomic ID	Scientific Name		Relative Ab	Taxonomic ID	Scientific Name		Relative Ab	Taxonomic ID	Scientific Name		Relative Ab	Taxonomic ID	Scientific Name		Relative Ab	Taxonomic ID	Scientific Name		Relative Ab	Taxonomic ID	Scientific Name		Relative Ab	Taxonomic ID	Scientific Name			Relative Ab	Taxonomic ID		Relative Ab	Taxonomic ID		Relative Ab	Taxonomic ID		Relative Ab	Taxonomic ID		Relative Ab	Taxonomic ID		Relative Ab	Taxonomic ID		Relative Ab	Taxonomic ID
1	taxid 380749	name Hydrogenobaculum sp. Y04AAS1		0.0284	taxaid 1007115	name "gamma proteobacterium SCGC AAA076-D13"		0.1027	taxaid 1007115	name "gamma proteobacterium SCGC AAA076-D13"		253	taxid 272559	name "Bacteroides fragilis NCTC 9343"		7304	taxid 697303	name "Thermoanaerobacter wiegelii Rt8.B1"		100000	taxid 272943	name "Rhodobacter sphaeroides 2.4.1"		1000000	taxid 272943	name "Rhodobacter sphaeroides 2.4.1"			1	taxid 817		52	taxid 817		225	taxid 817		1	taxid 287		29	taxid 287		922	taxid 287		1	taxid 139
1	taxid 123214	name Persephonella marina EX-H1		0.0016	taxaid 1009708	name "alpha proteobacterium SCGC AAA536-G10"		0.0457	taxaid 1009708	name "alpha proteobacterium SCGC AAA536-G10"		292	taxid 862962	name "Bacteroides fragilis 638R"		3737	taxid 46234	name "Anabaena sp. 90"		100000	taxid 869816	name "Staphylococcus aureus subsp. aureus JKD6159"		100000	taxid 869816	name "Staphylococcus aureus subsp. aureus JKD6159"			1	taxid 176279		52	taxid 176279		884	taxid 176279		1	taxid 670		35	taxid 670		675	taxid 670		1	taxid 139
1	taxid 436114	name Sulfurihydrogenibium sp. YO3AOP1		0.0434	taxaid 102134	name "Desulfotomaculum gibsoniae"		1.3652	taxaid 102134	name "Desulfotomaculum gibsoniae"		716	taxid 295405	name "Bacteroides fragilis YCH46"		1962	taxid 449447	name "Microcystis aeruginosa NIES-843"		100000	taxid 210007	name "Streptococcus mutans UA159"		1000000	taxid 210007	name "Streptococcus mutans UA159"			1	taxid 194439		77	taxid 194439		489	taxid 194439		1	taxid 817		44	taxid 817		252	taxid 817		1	taxid 287
1	taxid 432331	name Sulfurihydrogenibium yellowstonense SS-5		0.6416	taxaid 1042156	name "Clostridium sp. SY8519"		0.0926	taxaid 1042156	name "Clostridium sp. SY8519"		119	taxid 657309	name "Bacteroides xylanisolvens XB1A"		982	taxid 338969	name "Albidiferax ferrireducens T118"		100000	taxid 420247	name "Methanobrevibacter smithii ATCC 35061"		1000000	taxid 420247	name "Methanobrevibacter smithii ATCC 35061"			1	taxid 234621		2	taxid 234621		917	taxid 234621		1	taxid 1270		19	taxid 1270		131	taxid 1270		1	taxid 303
1	taxid 309803	name Thermotoga neapolitana DSM 4359		0.2338	taxaid 1042376	name "Flavobacteriaceae bacterium S85"		0.4984	taxaid 1042376	name "Flavobacteriaceae bacterium S85"		177	taxid 226186	name "Bacteroides thetaiotaomicron VPI-5482"		864	taxid 358220	name "Acidovorax sp. KKS102"		100000	taxid 910348	name "Escherichia coli P12b"		1000000	taxid 910348	name "Escherichia coli P12b"			1	taxid 272620		28	taxid 272620		770	taxid 272620		1	taxid 28025		46	taxid 28025		243	taxid 28025		1	taxid 339
1	taxid 390874	name Thermotoga petrophila RKU-1		0.0282	taxaid 1050222	name "Paenibacillus sp. Aloe-11"		0.3628	taxaid 1050222	name "Paenibacillus sp. Aloe-11"		28	taxid 667015	name "Bacteroides salanitronis DSM 18170"		852	taxid 296591	name "Polaromonas sp. JS666"		100000	taxid 208964	name "Pseudomonas aeruginosa PAO1"		100000	taxid 208964	name "Pseudomonas aeruginosa PAO1"			1	taxid 283166		92	taxid 283166		457	taxid 283166		1	taxid 28072		72	taxid 28072		119	taxid 28072		1	taxid 375
1	taxid 126740	name Thermotoga sp. RQ2		0.0035	taxaid 1054213	name "Acetobacteraceae bacterium AT-5844"		1.1418	taxaid 1054213	name "Acetobacteraceae bacterium AT-5844"		1843	taxid 657319	name "[Eubacterium] siraeum 70/3"		783	taxid 365044	name "Polaromonas naphthalenivorans CJ2"		100000	taxid 290402	name "Clostridium beijerinckii NCIMB 8052"		100000	taxid 290402	name "Clostridium beijerinckii NCIMB 8052"			1	taxid 288681		34	taxid 288681		885	taxid 288681		1	taxid 29339		85	taxid 29339		120	taxid 29339		1	taxid 644
1	taxid 243230	name Deinococcus radiodurans R1		0.1032	taxaid 1076	name "Rhodopseudomonas palustris"		0.526	taxaid 1076	name "Rhodopseudomonas palustris"		119	taxid 717961	name "[Eubacterium] siraeum V10Sc8a"		595	taxid 983917	name "Rubrivivax gelatinosus IL144"		100000	taxid 208435	name "Streptococcus agalactiae 2603V/R"		100000	taxid 208435	name "Streptococcus agalactiae 2603V/R"			1	taxid 319017		73	taxid 319017		857	taxid 319017		1	taxid 29339		19	taxid 29339		67	taxid 29339		1	taxid 670
1	taxid 300852	name Thermus thermophilus HB8		0.1114	taxaid 1095726	name "Streptococcus sp. SK140"		0.8895	taxaid 1095726	name "Streptococcus sp. SK140"		4841	taxid 657321	name "Ruminococcus bromii L2-63"		587	taxid 391735	name "Verminephrobacter eiseniae EF01-2"		100000	taxid 400667	name "Acinetobacter baumannii ATCC 17978"		10000	taxid 400667	name "Acinetobacter baumannii ATCC 17978"			1	taxid 391735		88	taxid 391735		689	taxid 391735		1	taxid 35746		55	taxid 35746		31	taxid 35746		1	taxid 672
1	taxid 513050	name Dictyoglomus turgidum		7.7727	taxaid 1097667	name "Patulibacter medicamentivorans"		0.0178	taxaid 1097667	name "Patulibacter medicamentivorans"		2544	taxid 717959	name "Alistipes shahii WAL 8301"		582	taxid 395495	name "Leptothrix cholodnii SP-6"		100000	taxid 243230	name "Deinococcus radiodurans R1"		1000	taxid 243230	name "Deinococcus radiodurans R1"			1	taxid 429009		33	taxid 429009		228	taxid 429009		1	taxid 160491		36	taxid 160491		889	taxid 160491		1	taxid 817
1	taxid 168697	name Salinispora arenicola		0.0022	taxaid 1111069	name "Thermus sp. CCB_US3_UF1"		0.1518	taxaid 1111069	name "Thermus sp. CCB_US3_UF1"		423	taxid 679935	name "Alistipes finegoldii DSM 17242"		508	taxid 420662	name "Methylibium petroleiphilum PM1"		100000	taxid 222523	name "Bacillus cereus ATCC 10987"		100000	taxid 222523	name "Bacillus cereus ATCC 10987"			1	taxid 445985		26	taxid 445985		49	taxid 445985		1	taxid 176279		18	taxid 176279		880	taxid 176279		1	taxid 1270
1	taxid 168695	name Salinispora tropica		0.0095	taxaid 1111120	name "Acidaminococcus sp. BV3L6"		0.1107	taxaid 1111120	name "Acidaminococcus sp. BV3L6"		2981	taxid 420247	name "Methanobrevibacter smithii ATCC 35061"		498	taxid 481448	name "Methylacidiphilum infernorum V4"		100000	taxid 267747	name "Propionibacterium acnes KPA171202"		10000	taxid 267747	name "Propionibacterium acnes KPA171202"			1	taxid 450851		25	taxid 450851		911	taxid 450851		1	taxid 191218		53	taxid 191218		680	taxid 191218		1	taxid 1282
1	taxid 324602	name Chloroflexus aurantiacus J-10-fl		0.6921	taxaid 1131272	name "Chloroflexi bacterium SCGC AB-629-P13"		0.0087	taxaid 1131272	name "Chloroflexi bacterium SCGC AB-629-P13"		2244	taxid 657322	name "Faecalibacterium prausnitzii SL3/3"		449	taxid 452637	name "Opitutus terrae PB90-1"		100000	taxid 122586	name "Neisseria meningitidis MC58"		10000	taxid 122586	name "Neisseria meningitidis MC58"			1	taxid 459424		27	taxid 459424		785	taxid 459424		1	taxid 191610		39	taxid 191610		265	taxid 191610		1	taxid 1888
1	taxid 65	name Herpetosiphon aurantiacus		0.0022	taxaid 1131273	name "Marinimicrobia bacterium SCGC AB-629-J13"		0.0223	taxaid 1131273	name "Marinimicrobia bacterium SCGC AB-629-J13"		1958	taxid 709991	name "Odoribacter splanchnicus DSM 20712"		383	taxid 700598	name "Niastella koreensis GR20-10"		100000	taxid 85962	name "Helicobacter pylori 26695"		10000	taxid 85962	name "Helicobacter pylori 26695"			1	taxid 479834		3	taxid 479834		563	taxid 479834		1	taxid 192222		21	taxid 192222		323	taxid 192222		1	taxid 28025
1	taxid 103690	name Nostoc sp. PCC 7120		0.1894	taxaid 1132442	name "Bacillus sp. 37MA"		0.5849	taxaid 1132442	name "Bacillus sp. 37MA"		1869	taxid 435591	name "Parabacteroides distasonis ATCC 8503"		373	taxid 1005048	name "Collimonas fungivorans Ter331"		100000	taxid 169963	name "Listeria monocytogenes EGD-e"		10000	taxid 169963	name "Listeria monocytogenes EGD-e"			1	taxid 535026		61	taxid 535026		133	taxid 535026		1	taxid 194439		8	taxid 194439		752	taxid 194439		1	taxid 28072
1	taxid 818	name Bacteroides thetaiotaomicron		0.0887	taxaid 1134055	name "Verrucomicrobium sp. 3C"		0.0006	taxaid 1134055	name "Verrucomicrobium sp. 3C"		74	taxid 657317	name "Eubacterium rectale M104/1"		343	taxid 640081	name "Dechlorosoma suillum PS"		100000	taxid 435590	name "Bacteroides vulgatus ATCC 8482"		1000	taxid 435590	name "Bacteroides vulgatus ATCC 8482"			1	taxid 535289		95	taxid 535289		595	taxid 535289		1	taxid 202752		8	taxid 202752		845	taxid 202752		1	taxid 29338
1	taxid 821	name Bacteroides vulgatus		0.2738	taxaid 1137281	name "Formosa sp. AK20"		0.2079	taxaid 1137281	name "Formosa sp. AK20"		117	taxid 515619	name "Eubacterium rectale ATCC 33656"		343	taxid 509170	name "Acinetobacter baumannii SDF"		100000	taxid 324831	name "Lactobacillus gasseri ATCC 33323"		10000	taxid 324831	name "Lactobacillus gasseri ATCC 33323"			1	taxid 572477		12	taxid 572477		567	taxid 572477		1	taxid 216142		78	taxid 216142		621	taxid 216142		1	taxid 29338
1	taxid 837	name Porphyromonas gingivalis		0.0085	taxaid 1144673	name "Acinetobacter sp. CIP 64.7"		0.2192	taxaid 1144673	name "Acinetobacter sp. CIP 64.7"		1410	taxid 718252	name "Faecalibacterium prausnitzii L2-6"		330	taxid 757424	name "Herbaspirillum seropedicae SmR1"		100000	taxid 474186	name "Enterococcus faecalis OG1RF"		1000	taxid 474186	name "Enterococcus faecalis OG1RF"			1	taxid 573825		14	taxid 573825		567	taxid 573825		1	taxid 224915		42	taxid 224915		654	taxid 224915		1	taxid 29339
1	taxid 1092	name Chlorobium limicola		0.184	taxaid 1150676	name "Rhodococcus sp. 29MFTsu3.1"		2.7043	taxaid 1150676	name "Rhodococcus sp. 29MFTsu3.1"		746	taxid 585394	name "Roseburia hominis A2-183"		320	taxid 1313172	name "Ilumatobacter coccineus YM16-304"		100000	taxid 170187	name "Streptococcus pneumoniae ATCC BAA-334"		1000	taxid 170187	name "Streptococcus pneumoniae ATCC BAA-334"			1	taxid 595500		59	taxid 595500		490	taxid 595500		1	taxid 226186		1	taxid 226186		928	taxid 226186		1	taxid 29339
1	taxid 1096	name Chlorobium phaeobacteroides		0.2216	taxaid 1156433	name "Streptococcus sp. I-P16"		0.0072	taxaid 1156433	name "Streptococcus sp. I-P16"		49	taxid 657315	name "Roseburia intestinalis M50/1"		306	taxid 292415	name "Thiobacillus denitrificans ATCC 25259"		100000	taxid 1660	name "Actinomyces odontolyticus ATCC 17982"		1000	taxid 1660	name "Actinomyces odontolyticus ATCC 17982"			1	taxid 634454		23	taxid 634454		256	taxid 634454		1	taxid 234621		80	taxid 234621		623	taxid 234621		1	taxid 35746
1	taxid 1094	name Chlorobium phaeovibrioides		0.0293	taxaid 1158154	name "Thioalkalivibrio sp. AKL6"		0.0522	taxaid 1158154	name "Thioalkalivibrio sp. AKL6"		41	taxid 718255	name "Roseburia intestinalis XB6B4"		304	taxid 1142394	name "Phycisphaera mikurensis NBRC 102666"		100000	taxid 176280	name "Staphylococcus epidermidis ATCC 12228"		1000000	taxid 176280	name "Staphylococcus epidermidis ATCC 12228"			1	taxid 637971		98	taxid 637971		126	taxid 637971		1	taxid 242231		82	taxid 242231		154	taxid 242231		1	taxid 36855
1	taxid 1097	name Chlorobium tepidum		0.4065	taxaid 1158758	name "Thioalkalivibrio sp. ALJ9"		0.2339	taxaid 1158758	name "Thioalkalivibrio sp. ALJ9"		44	taxid 515620	name "[Eubacterium] eligens ATCC 27750"		283	taxid 349741	name "Akkermansia muciniphila ATCC BAA-835"											1	taxid 643867		53	taxid 643867		133	taxid 643867		1	taxid 260799		95	taxid 260799		111	taxid 260799		1	taxid 40754
1	taxid 34090	name Pelodictyon phaeoclathratiforme		0.0146	taxaid 1158759	name "Thioalkalivibrio sp. ALJ10"		0.0925	taxaid 1158759	name "Thioalkalivibrio sp. ALJ10"		1130	taxid 649756	name "butyrate-producing bacterium SSC/2"		277	taxid 243365	name "Chromobacterium violaceum ATCC 12472"											1	taxid 645464		46	taxid 645464		896	taxid 645464		1	taxid 263820		36	taxid 263820		299	taxid 263820		1	taxid 44454
1	taxid 31899	name Caldicellulosiruptor bescii		0.1457	taxaid 1158761	name "Thioalkalivibrio sp. ALJ12"		0.0858	taxaid 1158761	name "Thioalkalivibrio sp. ALJ12"		1119	taxid 657313	name "Ruminococcus torques L2-14"		273	taxid 748247	name "Azoarcus sp. KH32C"											1	taxid 693971		61	taxid 693971		769	taxid 693971		1	taxid 264202		2	taxid 264202		228	taxid 264202		1	taxid 62977
1	taxid 44001	name Caldicellulosiruptor saccharolyticus		0.0129	taxaid 1166130	name "Enterobacter sp. R4-368"		0.0665	taxaid 1166130	name "Enterobacter sp. R4-368"		900	taxid 349741	name "Akkermansia muciniphila ATCC BAA-835"		243	taxid 426355	name "Methylobacterium radiotolerans JCM 2831"											1	taxid 755178		82	taxid 755178		336	taxid 755178		1	taxid 272620		6	taxid 272620		414	taxid 272620		1	taxid 65393
1	taxid 1515	name Clostridium thermocellum		0.0165	taxaid 1167637	name "Gillisia marina"		0.2582	taxaid 1167637	name "Gillisia marina"		569	taxid 435590	name "Bacteroides vulgatus ATCC 8482"		237	taxid 522306	name "Candidatus Accumulibacter phosphatis clade IIA str. UW-1"											1	taxid 759350		57	taxid 759350		727	taxid 759350		1	taxid 272622		48	taxid 272622		957	taxid 272622		1	taxid 65393
1	taxid 1351	name Enterococcus faecalis		0.25	taxaid 1169146	name "Microbacterium sp. 11MF"		0.1839	taxaid 1169146	name "Microbacterium sp. 11MF"		494	taxid 693979	name "Bacteroides helcogenes P 36-108"		228	taxid 998088	name "Aeromonas veronii B565"											1	taxid 768486		21	taxid 768486		304	taxid 768486		1	taxid 273035		25	taxid 273035		68	taxid 273035		1	taxid 66692
1	taxid 496866	name Thermoanaerobacter pseudethanolicus		0.1401	taxaid 1169153	name "Nocardiopsis sp. CNS639"		1.1027	taxaid 1169153	name "Nocardiopsis sp. CNS639"		330	taxid 717962	name "Coprococcus catus GD/7"		213	taxid 755732	name "Fluviicola taffensis DSM 16823"											1	taxid 936153		71	taxid 936153		792	taxid 936153		1	taxid 283166		64	taxid 283166		457	taxid 283166		1	taxid 107806
1	taxid 851	name Fusobacterium nucleatum		0.1543	taxaid 1169157	name "Streptomyces sp. CNQ766"		0.0105	taxaid 1169157	name "Streptomyces sp. CNQ766"		64	taxid 717960	name "[Eubacterium] cylindroides T2-87"		210	taxid 748280	name "Pseudogulbenkiania sp. NH8B"											1	taxid 1006006		95	taxid 1006006		677	taxid 1006006		1	taxid 288681		30	taxid 288681		594	taxid 288681		1	taxid 129394
1	taxid 239935	name Akkermansia muciniphila		0.3815	taxaid 1169322	name "Citrobacter sp. KTE151"		1.653	taxaid 1169322	name "Citrobacter sp. KTE151"		408	taxid 657314	name "Ruminococcus obeum A2-162"		187	taxid 83406	name "gamma proteobacterium HdN1"											1	taxid 1071761		27	taxid 1071761		53	taxid 1071761		1	taxid 290318		43	taxid 290318		257	taxid 290318		1	taxid 135735
1	taxid 173480	name Gemmatimonas aurantiaca		0.0919	taxaid 1169668	name "Enterococcus sp. GMD4E"		0.0437	taxaid 1169668	name "Enterococcus sp. GMD4E"		247	taxid 717608	name "[Clostridium] cf. saccharolyticum K10"		151	taxid 557598	name "Laribacter hongkongensis HLHK9"											1	taxid 1071764		4	taxid 1071764		870	taxid 1071764		1	taxid 290434		21	taxid 290434		644	taxid 290434		1	taxid 138119
1	taxid 265606	name Rhodopirellula baltica		0.2286	taxaid 1169855	name "Rhodobacteraceae bacterium PD-2"		0.4904	taxaid 1169855	name "Rhodobacteraceae bacterium PD-2"		51	taxid 751585	name "Coprococcus sp. ART55/1"		146	taxid 984262	name "Saprospira grandis str. Lewin"											1	taxid 1091494		61	taxid 1091494		205	taxid 1091494		1	taxid 311402		29	taxid 311402		822	taxid 311402		1	taxid 160491
1	taxid 158	name Treponema denticola		0.0266	taxaid 1174684	name "Sphingopyxis sp. MC1"		0.0046	taxaid 1174684	name "Sphingopyxis sp. MC1"		25	taxid 1042156	name "Clostridium sp. SY8519"		141	taxid 360910	name "Bordetella avium 197N"											1	taxid 1094714		49	taxid 1094714		987	taxid 1094714		1	taxid 313596		100	taxid 313596		215	taxid 313596		1	taxid 176279
1	taxid 33075	name Acidobacterium capsulatum		0.3146	taxaid 1203562	name "Corynebacterium sp. KPL1855"		0.0416	taxaid 1203562	name "Corynebacterium sp. KPL1855"		335	taxid 657323	name "Ruminococcus sp. SR1/5"		140	taxid 159087	name "Dechloromonas aromatica RCB"											1	taxid 1096997		60	taxid 1096997		893	taxid 1096997		1	taxid 314724		67	taxid 314724		784	taxid 314724		1	taxid 176280
1	taxid 89184	name Ruegeria pomeroyi		0.7373	taxaid 1203566	name "Corynebacterium sp. KPL1859"		0.2457	taxaid 1203566	name "Corynebacterium sp. KPL1859"		175	taxid 657308	name "Gordonibacter pamelaeae 7-10-1-b"		136	taxid 1163617	name "Sulfuricella denitrificans skB26"											1	taxid 1150469		79	taxid 1150469		93	taxid 1150469		1	taxid 316058		67	taxid 316058		430	taxid 316058		1	taxid 191218
1	taxid 52598	name Sulfitobacter sp. EE-36		0.0043	taxaid 1203627	name "Corynebacterium sp. KPL1998"		0.0211	taxaid 1203627	name "Corynebacterium sp. KPL1998"		148	taxid 1384484	name "Adlercreutzia equolifaciens DSM 19450"		123	taxid 572477	name "Allochromatium vinosum DSM 180"											1	taxid 1155096		39	taxid 1155096		733	taxid 1155096		1	taxid 319017		77	taxid 319017		994	taxid 319017		1	taxid 191610
1	taxid 314267	name Sulfitobacter sp. NAS-14.1		0.0115	taxaid 1209364	name "Bacillus sp. WBUNB004"		0.1074	taxaid 1209364	name "Bacillus sp. WBUNB004"		94	taxid 245014	name "butyrate-producing bacterium SS3/4"		114	taxid 264731	name "Prevotella ruminicola 23"											1	taxid 1223569		41	taxid 1223569		927	taxid 1223569		1	taxid 321314		15	taxid 321314		797	taxid 321314		1	taxid 192222
1	taxid 542	name Zymomonas mobilis		3.5227	taxaid 1209372	name "Bacillus sp. WBUNB009"		2.1568	taxaid 1209372	name "Bacillus sp. WBUNB009"		71	taxid 479437	name "Eggerthella lenta DSM 2243"		112	taxid 414684	name "Rhodospirillum centenum SW"											1	taxid 1224144		88	taxid 1224144		969	taxid 1224144		1	taxid 322098		70	taxid 322098		199	taxid 322098		1	taxid 194439
1	taxid 518	name Bordetella bronchiseptica		3.5902	taxaid 1224136	name "Enterobacteriaceae bacterium LSJC7"		0.521	taxaid 1224136	name "Enterobacteriaceae bacterium LSJC7"		47	taxid 903814	name "Eubacterium limosum KIST612"		111	taxid 1064539	name "Azospirillum brasilense Sp245"											1	taxid 1224146		42	taxid 1224146		650	taxid 1224146		1	taxid 357347		12	taxid 357347		909	taxid 357347		1	taxid 202752
1	taxid 266265	name Burkholderia xenovorans LB400		0.0385	taxaid 1229484	name "alpha proteobacterium LLX12A"		0.4587	taxaid 1229484	name "alpha proteobacterium LLX12A"		45	taxid 693746	name "Oscillibacter valericigenes Sjm18-20"		107	taxid 380358	name "Xanthomonas albilineans GPE PC73"											1	taxid 1306418		53	taxid 1306418		652	taxid 1306418		1	taxid 358220		6	taxid 358220		150	taxid 358220		1	taxid 212717
1	taxid 34029	name Leptothrix cholodnii		0.2989	taxaid 1230476	name "Bradyrhizobium sp. DFCI-1"		0.3747	taxaid 1230476	name "Bradyrhizobium sp. DFCI-1"						106	taxid 1367477	name "Bacillus infantis NRRL B-14911"											1	taxid 1328324		78	taxid 1328324		450	taxid 1328324		1	taxid 363253		20	taxid 363253		496	taxid 363253		1	taxid 216142
1	taxid 915	name Nitrosomonas europaea		0.5832	taxaid 1231180	name "Nitratireductor pacificus"		0.0253	taxaid 1231180	name "Nitratireductor pacificus"						105	taxid 1007105	name "Pusillimonas sp. T7-7"											1	taxid 1338411		62	taxid 1338411		749	taxid 1338411		1	taxid 366394		30	taxid 366394		529	taxid 366394		1	taxid 216895
1	taxid 402882	name Shewanella baltica OS185		0.1242	taxaid 1235799	name "Lachnospiraceae bacterium 3-2"		0.03	taxaid 1235799	name "Lachnospiraceae bacterium 3-2"						104	taxid 243233	name "Methylococcus capsulatus str. Bath"											1	taxid 1354240		89	taxid 1354240		288	taxid 1354240		1	taxid 366394		5	taxid 366394		884	taxid 366394		1	taxid 218497
1	taxid 407976	name Shewanella baltica OS223		0.0724	taxaid 1235803	name "Parabacteroides sp. ASF519"		1.0694	taxaid 1235803	name "Parabacteroides sp. ASF519"						104	taxid 396588	name "Thioalkalivibrio sulfidophilus HL-EbGr7"											1	taxid 1354302		6	taxid 1354302		593	taxid 1354302		1	taxid 377629		25	taxid 377629		535	taxid 377629		1	taxid 220341
1	taxid 901	name Desulfovibrio piger		0.0396	taxaid 1237929	name "Thioalkalivibrio sp. ALJ5"		0.007	taxaid 1237929	name "Thioalkalivibrio sp. ALJ5"						101	taxid 441620	name "Methylobacterium populi BJ001"											1	taxid 1382923		53	taxid 1382923		795	taxid 1382923		1	taxid 391735		33	taxid 391735		418	taxid 391735		1	taxid 224326
1	taxid 391774	name Desulfovibrio vulgaris DP4		0.0009	taxaid 1240726	name "Xanthomonas sp. SHU166"		0.0048	taxaid 1240726	name "Xanthomonas sp. SHU166"						100	taxid 342108	name "Magnetospirillum magneticum AMB-1"											1	taxid 1394180		42	taxid 1394180		831	taxid 1394180		1	taxid 398580		18	taxid 398580		154	taxid 398580		1	taxid 224326
1	taxid 243231	name Geobacter sulfurreducens PCA		0.001	taxaid 1240783	name "Xanthomonas sp. SHU199"		0.0018	taxaid 1240783	name "Xanthomonas sp. SHU199"						99	taxid 450851	name "Phenylobacterium zucineum HLK1"											1	taxid 1420885		54	taxid 1420885		891	taxid 1420885		1	taxid 401473		20	taxid 401473		854	taxid 401473		1	taxid 224915
1	taxid 844	name Wolinella succinogenes		0.0096	taxaid 1243180	name "Haloferax sp. BAB2207"		0.0783	taxaid 1243180	name "Haloferax sp. BAB2207"						98	taxid 469383	name "Conexibacter woesei DSM 14684"											1	taxid 1423891		79	taxid 1423891		252	taxid 1423891		1	taxid 416348		62	taxid 416348		46	taxid 416348		1	taxid 226186
1	taxid 160233	name Ignicoccus hospitalis		0.0346	taxaid 1262697	name "Alistipes sp. CAG:53"		0.021	taxaid 1262697	name "Alistipes sp. CAG:53"						98	taxid 187303	name "Methylocystis sp. SC2"											1	taxid 1435981		27	taxid 1435981		239	taxid 1435981		1	taxid 426117		73	taxid 426117		498	taxid 426117		1	taxid 234621
1	taxid 178306	name Pyrobaculum aerophilum IM2		0.0213	taxaid 1262734	name "Bacteroides sp. CAG:1060"		0.0222	taxaid 1262734	name "Bacteroides sp. CAG:1060"						93	taxid 1137651	name "Xanthomonas citri subsp. citri Aw12879"											1	taxid 1484157		10	taxid 1484157		302	taxid 1484157		1	taxid 429009		100	taxid 429009		21	taxid 429009		1	taxid 234831
1	taxid 121277	name Pyrobaculum arsenaticum		0.0919	taxaid 1262739	name "Bacteroides sp. CAG:443"		0.006	taxaid 1262739	name "Bacteroides sp. CAG:443"						88	taxid 743721	name "Pseudoxanthomonas suwonensis 11-1"																				1	taxid 438753		12	taxid 438753		958	taxid 438753		1	taxid 242231
1	taxid 181486	name Pyrobaculum calidifontis		0.0325	taxaid 1262749	name "Bacteroides sp. CAG:714"		0.0329	taxaid 1262749	name "Bacteroides sp. CAG:714"						86	taxid 512565	name "Actinoplanes missouriensis 431"																				1	taxid 439855		9	taxid 439855		587	taxid 439855		1	taxid 243265
1	taxid 111955	name Sulfolobus tokodaii		0.5858	taxaid 1262788	name "Clostridium sp. CAG:269"		0.0591	taxaid 1262788	name "Clostridium sp. CAG:269"						86	taxid 1036672	name "Advenella kashmirensis WT001"																				1	taxid 441772		24	taxid 441772		906	taxid 441772		1	taxid 260799
1	taxid 2261	name Pyrococcus furiosus		0.0554	taxaid 1262810	name "Clostridium sp. CAG:452"		0.2317	taxaid 1262810	name "Clostridium sp. CAG:452"						84	taxid 754252	name "Propionibacterium freudenreichii subsp. shermanii CIRM-BIA1"																				1	taxid 444612		63	taxid 444612		397	taxid 444612		1	taxid 261591
1	taxid 53953	name Pyrococcus horikoshii		0.0395	taxaid 1262820	name "Clostridium sp. CAG:567"		0.0337	taxaid 1262820	name "Clostridium sp. CAG:567"						83	taxid 502025	name "Haliangium ochraceum DSM 14365"																				1	taxid 445985		63	taxid 445985		424	taxid 445985		1	taxid 263820
1	taxid 379547	name Aciduliprofundum boonei		0.0061	taxaid 1262862	name "Coprococcus sp. CAG:131"		0.0082	taxaid 1262862	name "Coprococcus sp. CAG:131"						83	taxid 702113	name "Novosphingobium sp. PP1Y"																				1	taxid 450851		11	taxid 450851		245	taxid 450851		1	taxid 264202
1	taxid 2234	name Archaeoglobus fulgidus		0.0206	taxaid 1262921	name "Prevotella sp. CAG:1185"		0.5665	taxaid 1262921	name "Prevotella sp. CAG:1185"						80	taxid 187272	name "Alkalilimnicola ehrlichii MLHE-1"																				1	taxid 451709		36	taxid 451709		16	taxid 451709		1	taxid 269084
1	taxid 2246	name Haloferax volcanii		0.025	taxaid 1262931	name "Prevotella sp. CAG:592"		0.2589	taxaid 1262931	name "Prevotella sp. CAG:592"						78	taxid 990288	name "Acidithiobacillus caldus SM-1"																				1	taxid 457570		67	taxid 457570		712	taxid 457570		1	taxid 272620
1	taxid 2320	name Methanopyrus kandleri		0.1208	taxaid 1262933	name "Prevotella sp. CAG:617"		0.0116	taxaid 1262933	name "Prevotella sp. CAG:617"						78	taxid 1196835	name "Pseudomonas stutzeri CCUG 29243"																				1	taxid 459424		32	taxid 459424		870	taxid 459424		1	taxid 272622
1	taxid 188937	name Methanosarcina acetivorans C2A		0.056	taxaid 1262936	name "Prevotella sp. CAG:873"		0.0047	taxaid 1262936	name "Prevotella sp. CAG:873"						77	taxid 573065	name "Asticcacaulis excentricus CB 48"																				1	taxid 471472		81	taxid 471472		647	taxid 471472		1	taxid 272630
1	taxid 2190	name Methanocaldococcus jannaschii		0.1571	taxaid 1262957	name "Ruminococcus sp. CAG:382"		7.312	taxaid 1262957	name "Ruminococcus sp. CAG:382"						77	taxid 269798	name "Cytophaga hutchinsonii ATCC 33406"																				1	taxid 478433		6	taxid 478433		959	taxid 478433		1	taxid 272634
1	taxid 402880	name Methanococcus maripaludis C5		0.1655	taxaid 1262963	name "Ruminococcus sp. CAG:579"		0.0127	taxaid 1262963	name "Ruminococcus sp. CAG:579"						77	taxid 765912	name "Thioflavicoccus mobilis 8321"																				1	taxid 479435		23	taxid 479435		513	taxid 479435		1	taxid 272943
1	taxid 267377	name Methanococcus maripaludis S2		0.0393	taxaid 1263001	name "Firmicutes bacterium CAG:114"		0.0033	taxaid 1263001	name "Firmicutes bacterium CAG:114"						73	taxid 479433	name "Catenulispora acidiphila DSM 44928"																				1	taxid 479834		78	taxid 479834		56	taxid 479834		1	taxid 273035
1	taxid 160232	name Nanoarchaeum equitans		1.4289	taxaid 1263006	name "Firmicutes bacterium CAG:170"		0.2456	taxaid 1263006	name "Firmicutes bacterium CAG:170"						72	taxid 649349	name "Leadbetterella byssophila DSM 17132"																				1	taxid 497965		40	taxid 497965		594	taxid 497965		1	taxid 273063
				0.038	taxaid 1263044	name "Bacteroides faecis CAG:32"		0.2284	taxaid 1263044	name "Bacteroides faecis CAG:32"						72	taxid 1045855	name "Pseudoxanthomonas spadix BD-a59"																				1	taxid 499174		72	taxid 499174		322	taxid 499174		1	taxid 283166
				0.0228	taxaid 1263059	name "Bifidobacterium longum CAG:69"		0.0192	taxaid 1263059	name "Bifidobacterium longum CAG:69"						71	taxid 395965	name "Methylocella silvestris BL2"																				1	taxid 499175		5	taxid 499175		600	taxid 499175		1	taxid 288681
				0.1343	taxaid 1263062	name "Butyrivibrio crossotus CAG:259"		0.0012	taxaid 1263062	name "Butyrivibrio crossotus CAG:259"						71	taxid 438753	name "Azorhizobium caulinodans ORS 571"																				1	taxid 511995		27	taxid 511995		202	taxid 511995		1	taxid 288681
				0.0019	taxaid 1263070	name "Coprococcus comes CAG:19"		0.0281	taxaid 1263070	name "Coprococcus comes CAG:19"						70	taxid 666685	name "Rhodanobacter denitrificans"																				1	taxid 521096		24	taxid 521096		597	taxid 521096		1	taxid 289380
				0.3709	taxaid 1263099	name "Parasutterella excrementihominis CAG:233"		0.089	taxaid 1263099	name "Parasutterella excrementihominis CAG:233"						69	taxid 331678	name "Chlorobium phaeobacteroides BS1"																				1	taxid 523796		67	taxid 523796		747	taxid 523796		1	taxid 290318
				0.0657	taxaid 1263106	name "Ruminococcus gnavus CAG:126"		0.0736	taxaid 1263106	name "Ruminococcus gnavus CAG:126"						69	taxid 639283	name "Starkeya novella DSM 506"																				1	taxid 535026		85	taxid 535026		517	taxid 535026		1	taxid 290434
				0.0864	taxaid 1266845	name "Carnobacterium inhibens subsp. gilichinskyi"		0.031	taxaid 1266845	name "Carnobacterium inhibens subsp. gilichinskyi"						68	taxid 479432	name "Streptosporangium roseum DSM 43021"																				1	taxid 535026		66	taxid 535026		979	taxid 535026		1	taxid 309800
				0.1892	taxaid 1282886	name "Aeromonas sp. MDS8"		2.0232	taxaid 1282886	name "Aeromonas sp. MDS8"						66	taxid 395963	name "Beijerinckia indica subsp. indica ATCC 9039"																				1	taxid 535289		17	taxid 535289		482	taxid 535289		1	taxid 311402
				0.0187	taxaid 1287055	name "Brachyspira hampsonii"		0.0798	taxaid 1287055	name "Brachyspira hampsonii"						66	taxid 743720	name "Pseudomonas fulva 12-X"																				1	taxid 541229		23	taxid 541229		698	taxid 541229		1	taxid 311402
				0.0231	taxaid 1287182	name "Mesorhizobium sp. L48C026A00"		0.0577	taxaid 1287182	name "Mesorhizobium sp. L48C026A00"						66	taxid 1245471	name "Pseudomonas resinovorans NBRC 106553"																				1	taxid 543736		36	taxid 543736		991	taxid 543736		1	taxid 313596
				0.0031	taxaid 1287240	name "Mesorhizobium sp. LNHC229A00"		1.4459	taxaid 1287240	name "Mesorhizobium sp. LNHC229A00"						65	taxid 1110502	name "Tistrella mobilis KA081020-065"																				1	taxid 543891		91	taxid 543891		659	taxid 543891		1	taxid 314723
				0.029	taxaid 1287287	name "Mesorhizobium sp. LSHC414A00"		1.2157	taxaid 1287287	name "Mesorhizobium sp. LSHC414A00"						65	taxid 402881	name "Parvibaculum lavamentivorans DS-1"																				1	taxid 547559		20	taxid 547559		819	taxid 547559		1	taxid 314724
				0.8097	taxaid 1287289	name "Mesorhizobium sp. LSHC416B00"		0.0418	taxaid 1287289	name "Mesorhizobium sp. LSHC416B00"						64	taxid 279238	name "Novosphingobium aromaticivorans DSM 12444"																				1	taxid 570416		28	taxid 570416		230	taxid 570416		1	taxid 316058
				0.0235	taxaid 1287321	name "Mesorhizobium sp. LSJC264A00"		4.4589	taxaid 1287321	name "Mesorhizobium sp. LSJC264A00"						64	taxid 1255043	name "Thioalkalivibrio nitratireducens DSM 14787"																				1	taxid 572477		56	taxid 572477		982	taxid 572477		1	taxid 316273
				0.2894	taxaid 1304	name "Streptococcus salivarius"		0.0675	taxaid 1304	name "Streptococcus salivarius"						63	taxid 78245	name "Xanthobacter autotrophicus Py2"																				1	taxid 573825		9	taxid 573825		345	taxid 573825		1	taxid 316279
				0.0001	taxaid 1306787	name "Alcanivorax pacificus"		0.4997	taxaid 1306787	name "Alcanivorax pacificus"						63	taxid 205922	name "Pseudomonas fluorescens Pf0-1"																				1	taxid 577650		50	taxid 577650		682	taxid 577650		1	taxid 319017
				1.7054	taxaid 1310	name "Streptococcus sobrinus"		1.281	taxaid 1310	name "Streptococcus sobrinus"						60	taxid 528354	name "Neisseria gonorrhoeae MS11"																				1	taxid 585531		28	taxid 585531		564	taxid 585531		1	taxid 320371
				0.1511	taxaid 131081	name "Corynebacterium capitovis"		0.0313	taxaid 131081	name "Corynebacterium capitovis"						60	taxid 391165	name "Granulibacter bethesdensis CGDNIH1"																				1	taxid 595500		97	taxid 595500		746	taxid 595500		1	taxid 320371
				0.1351	taxaid 1314	name "Streptococcus pyogenes"		1.4207	taxaid 1314	name "Streptococcus pyogenes"						60	taxid 1294143	name "Pseudomonas denitrificans ATCC 13867"																				1	taxid 627343		81	taxid 627343		191	taxid 627343		1	taxid 321314
				0.0008	taxaid 1332069	name "Pantoea sp. AS-PWVM4"		0.0329	taxaid 1332069	name "Pantoea sp. AS-PWVM4"						58	taxid 1005058	name "Gallibacterium anatis UMN179"																				1	taxid 633699		24	taxid 633699		749	taxid 633699		1	taxid 321314
				0.0826	taxaid 1338	name "Streptococcus intermedius"		0.002	taxaid 1338	name "Streptococcus intermedius"						56	taxid 196162	name "Nocardioides sp. JS614"																				1	taxid 634454		15	taxid 634454		137	taxid 634454		1	taxid 322098
				0.1386	taxaid 1345697	name "Geobacillus sp. JF8"		1.0072	taxaid 1345697	name "Geobacillus sp. JF8"						56	taxid 991905	name "Polymorphum gilvum SL003B-26A1"																				1	taxid 637380		3	taxid 637380		720	taxid 637380		1	taxid 324602
				1.0581	taxaid 134676	name "Actinoplanes sp. SE50/110"		0.8405	taxaid 134676	name "Actinoplanes sp. SE50/110"						55	taxid 334380	name "Orientia tsutsugamushi str. Ikeda"																				1	taxid 637971		5	taxid 637971		41	taxid 637971		1	taxid 325240
				1.6833	taxaid 1353530	name "Bacteriovorax sp. DB6_IX"		0.0544	taxaid 1353530	name "Bacteriovorax sp. DB6_IX"						55	taxid 316056	name "Rhodopseudomonas palustris BisB18"																				1	taxid 643867		25	taxid 643867		867	taxid 643867		1	taxid 326427
				1.9085	taxaid 137730	name "Facklamia ignava"		0.0074	taxaid 137730	name "Facklamia ignava"						54	taxid 1123519	name "Pseudomonas stutzeri DSM 10701"																				1	taxid 645464		4	taxid 645464		879	taxid 645464		1	taxid 329726
				0.3743	taxaid 1378168	name "Firmicutes bacterium ASF500"		0.202	taxaid 1378168	name "Firmicutes bacterium ASF500"						53	taxid 866536	name "Belliella baltica DSM 15883"																				1	taxid 688245		60	taxid 688245		363	taxid 688245		1	taxid 333849
				0.0135	taxaid 1384060	name "Rhodococcus sp. P27"		0.0253	taxaid 1384060	name "Rhodococcus sp. P27"						53	taxid 379066	name "Gemmatimonas aurantiaca T-27"																				1	taxid 693971		68	taxid 693971		361	taxid 693971		1	taxid 334406
				2.217	taxaid 1386078	name "Pseudomonas sp. EGD-AK9"		0.0062	taxaid 1386078	name "Pseudomonas sp. EGD-AK9"						52	taxid 351607	name "Acidothermus cellulolyticus 11B"																				1	taxid 695562		74	taxid 695562		882	taxid 695562		1	taxid 344609
				2.685	taxaid 1386080	name "Bacillus sp. EGD-AK10"		2.9399	taxaid 1386080	name "Bacillus sp. EGD-AK10"						52	taxid 765911	name "Thiocystis violascens DSM 198"																				1	taxid 698936		57	taxid 698936		290	taxid 698936		1	taxid 348824
				0.0109	taxaid 139	name "Borreliella burgdorferi"		0.0225	taxaid 139	name "Borreliella burgdorferi"						52	taxid 392499	name "Sphingomonas wittichii RW1"																				1	taxid 699034		100	taxid 699034		214	taxid 699034		1	taxid 350054
				0.0026	taxaid 1394711	name "Candidatus Saccharibacteria bacterium RAAC3_TM7_1"		0.2921	taxaid 1394711	name "Candidatus Saccharibacteria bacterium RAAC3_TM7_1"						51	taxid 930169	name "Alcanivorax dieselolei B5"																				1	taxid 702456		29	taxid 702456		49	taxid 702456		1	taxid 357244
				0.2874	taxaid 1396	name "Bacillus cereus"		1.909	taxaid 1396	name "Bacillus cereus"						51	taxid 349102	name "Rhodobacter sphaeroides ATCC 17025"																				1	taxid 707186		48	taxid 707186		644	taxid 707186		1	taxid 357347
				0.1617	taxaid 1397532	name "Marinobacter sp. EVN1"		0.0457	taxaid 1397532	name "Marinobacter sp. EVN1"						51	taxid 396595	name "Thioalkalivibrio sp. K90mix"																				1	taxid 718271		25	taxid 718271		559	taxid 718271		1	taxid 357347
				0.4544	taxaid 1412874	name "uncultured archaeon A07HR60"		0.0439	taxaid 1412874	name "uncultured archaeon A07HR60"						50	taxid 216595	name "Pseudomonas fluorescens SBW25"																				1	taxid 743277		30	taxid 743277		249	taxid 743277		1	taxid 357347
				0.7369	taxaid 1428	name "Bacillus thuringiensis"		0.0157	taxaid 1428	name "Bacillus thuringiensis"						50	taxid 469371	name "Thermobispora bispora DSM 43833"																				1	taxid 743973		20	taxid 743973		615	taxid 743973		1	taxid 357347
				1.1583	taxaid 1464	name "Paenibacillus larvae"		0.0162	taxaid 1464	name "Paenibacillus larvae"						49	taxid 633149	name "Brevundimonas subvibrioides ATCC 15264"																				1	taxid 748003		9	taxid 748003		18	taxid 748003		1	taxid 357347
				8.2984	taxaid 1465	name "Brevibacillus laterosporus"		5.1846	taxaid 1465	name "Brevibacillus laterosporus"						49	taxid 439375	name "Ochrobactrum anthropi ATCC 49188"																				1	taxid 755178		30	taxid 755178		122	taxid 755178		1	taxid 358220
				0.0099	taxaid 146826	name "Halorhabdus utahensis"		0.0284	taxaid 146826	name "Halorhabdus utahensis"						47	taxid 272568	name "Gluconacetobacter diazotrophicus PAl 5"																				1	taxid 759350		42	taxid 759350		734	taxid 759350		1	taxid 360118
				0.3023	taxaid 1496	name "Peptoclostridium difficile"		0.0255	taxaid 1496	name "Peptoclostridium difficile"						47	taxid 745310	name "Sphingomonas sp. MM-1"																				1	taxid 762376		39	taxid 762376		920	taxid 762376		1	taxid 363253
				0.0419	taxaid 1590	name "Lactobacillus plantarum"		0.0533	taxaid 1590	name "Lactobacillus plantarum"						46	taxid 595499	name "Candidatus Sulcia muelleri SMDSEM"																				1	taxid 762903		21	taxid 762903		984	taxid 762903		1	taxid 365044
				0.0221	taxaid 160	name "Treponema pallidum"		0.4344	taxaid 160	name "Treponema pallidum"						46	taxid 323098	name "Nitrobacter winogradskyi Nb-255"																				1	taxid 768486		9	taxid 768486		402	taxid 768486		1	taxid 366394
				0.0088	taxaid 1624	name "Lactobacillus salivarius"		0.007	taxaid 1624	name "Lactobacillus salivarius"						45	taxid 768066	name "Halomonas elongata DSM 2581"																				1	taxid 768672		11	taxid 768672		1	taxid 768672		1	taxid 366394
				0.006	taxaid 1646	name "Renibacterium salmoninarum"		0.0952	taxaid 1646	name "Renibacterium salmoninarum"						44	taxid 1150469	name "Rhodospirillum photometricum DSM 122"																				1	taxid 838561		37	taxid 838561		344	taxid 838561		1	taxid 377629
				0.3676	taxaid 174	name "Leptospira borgpetersenii"		1.6926	taxaid 174	name "Leptospira borgpetersenii"						44	taxid 644966	name "Thermaerobacter marianensis DSM 12885"																				1	taxid 878220		15	taxid 878220		990	taxid 878220		1	taxid 379066
				0.2257	taxaid 1800	name "Mycobacterium chubuense"		0.3316	taxaid 1800	name "Mycobacterium chubuense"						44	taxid 1002804	name "Helicobacter bizzozeronii CIII-1"																				1	taxid 882095		14	taxid 882095		292	taxid 882095		1	taxid 380394
				0.0325	taxaid 186192	name "Marinithermus hydrothermalis"		0.0154	taxaid 186192	name "Marinithermus hydrothermalis"						42	taxid 573370	name "Desulfovibrio magneticus RS-1"																				1	taxid 907239		93	taxid 907239		158	taxid 907239		1	taxid 388467
				2.9376	taxaid 195	name "Campylobacter coli"		0.0525	taxaid 195	name "Campylobacter coli"						41	taxid 1082931	name "Pelagibacterium halotolerans B2"																				1	taxid 936153		14	taxid 936153		186	taxid 936153		1	taxid 391008
				0.207	taxaid 195250	name "Synechococcus sp. PCC 7336"		0.066	taxaid 195250	name "Synechococcus sp. PCC 7336"						41	taxid 644282	name "Desulfarculus baarsii DSM 2075"																				1	taxid 988812		94	taxid 988812		947	taxid 988812		1	taxid 391619
				0.0539	taxaid 197575	name "Haemophilus aegyptius"		0.0011	taxaid 197575	name "Haemophilus aegyptius"						41	taxid 577650	name "Desulfobulbus propionicus DSM 2032"																				1	taxid 1004954		12	taxid 1004954		856	taxid 1004954		1	taxid 391735
				0.1413	taxaid 2051	name "Mobiluncus curtisii"		0.0204	taxaid 2051	name "Mobiluncus curtisii"						41	taxid 384676	name "Pseudomonas entomophila L48"																				1	taxid 1006006		26	taxid 1006006		402	taxid 1006006		1	taxid 391774
				0.5992	taxaid 2096	name "Mycoplasma gallisepticum"		0.4327	taxaid 2096	name "Mycoplasma gallisepticum"						41	taxid 627192	name "Sphingobium sp. SYK-6"																				1	taxid 1037915		66	taxid 1037915		907	taxid 1037915		1	taxid 393305
				0.276	taxaid 217159	name "Clostridium carboxidivorans"		0.0391	taxaid 217159	name "Clostridium carboxidivorans"						40	taxid 682795	name "Granulicella mallensis MP5ACTX8"																				1	taxid 1064535		42	taxid 1064535		666	taxid 1064535		1	taxid 395491
				0.003	taxaid 2203	name "Methanospirillum hungatei"		2.2111	taxaid 2203	name "Methanospirillum hungatei"						39	taxid 349124	name "Halorhodospira halophila SL1"																				1	taxid 1068978		60	taxid 1068978		226	taxid 1068978		1	taxid 395963
				0.5968	taxaid 228006	name "Nocardia tenerifensis"		0.433	taxaid 228006	name "Nocardia tenerifensis"						39	taxid 648757	name "Rhodomicrobium vannielii ATCC 17100"																				1	taxid 1071761		25	taxid 1071761		116	taxid 1071761		1	taxid 398580
				0.0311	taxaid 2371	name "Xylella fastidiosa"		0.0496	taxaid 2371	name "Xylella fastidiosa"						39	taxid 228405	name "Hyphomonas neptunium ATCC 15444"																				1	taxid 1071764		17	taxid 1071764		390	taxid 1071764		1	taxid 398580
				0.363	taxaid 245012	name "butyrate-producing bacterium SM4/1"		0.1953	taxaid 245012	name "butyrate-producing bacterium SM4/1"						38	taxid 272942	name "Rhodobacter capsulatus SB 1003"																				1	taxid 1087451		21	taxid 1087451		43	taxid 1087451		1	taxid 399550
				0.8855	taxaid 247639	name "marine gamma proteobacterium HTCC2080"		0.0131	taxaid 247639	name "marine gamma proteobacterium HTCC2080"						38	taxid 767434	name "Frateuria aurantia DSM 6220"																				1	taxid 1088719		19	taxid 1088719		222	taxid 1088719		1	taxid 401473
				0.0263	taxaid 263	name "Francisella tularensis"		0.0456	taxaid 263	name "Francisella tularensis"						37	taxid 511062	name "Oceanimonas sp. GK1"																				1	taxid 1088719		69	taxid 1088719		998	taxid 1088719		1	taxid 402626
				0.1354	taxaid 265606	name "Rhodopirellula baltica"		2.0453	taxaid 265606	name "Rhodopirellula baltica"						37	taxid 330214	name "Candidatus Nitrospira defluvii"																				1	taxid 1088719		6	taxid 1088719		207	taxid 1088719		1	taxid 406984
				0.5119	taxaid 28173	name "Vibrio nigripulchritudo"		4.6596	taxaid 28173	name "Vibrio nigripulchritudo"						37	taxid 994484	name "Pseudomonas brassicacearum subsp. brassicacearum NFM421"																				1	taxid 1091494		88	taxid 1091494		10	taxid 1091494		1	taxid 411555
				0.0276	taxaid 28901	name "Salmonella enterica"		0.2003	taxaid 28901	name "Salmonella enterica"						36	taxid 323097	name "Nitrobacter hamburgensis X14"																				1	taxid 1094714		29	taxid 1094714		577	taxid 1094714		1	taxid 412419
				5.6471	taxaid 290399	name "Arthrobacter sp. FB24"		0.0235	taxaid 290399	name "Arthrobacter sp. FB24"						34	taxid 550540	name "Ferrimonas balearica DSM 9799"																				1	taxid 1094715		34	taxid 1094715		322	taxid 1094715		1	taxid 416348
				1.6842	taxaid 291645	name "Bacteroides nordii"		0.0024	taxaid 291645	name "Bacteroides nordii"						34	taxid 1091494	name "Methylomicrobium alcaliphilum 20Z"																				1	taxid 1096997		56	taxid 1096997		592	taxid 1096997		1	taxid 419942
				0.0123	taxaid 29484	name "Yersinia frederiksenii"		0.2873	taxaid 29484	name "Yersinia frederiksenii"						33	taxid 743299	name "Acidithiobacillus ferrivorans SS3"																				1	taxid 1097668		6	taxid 1097668		3	taxid 1097668		1	taxid 426117
				0.002	taxaid 29507	name "Leptospira kirschneri"		0.1867	taxaid 29507	name "Leptospira kirschneri"						32	taxid 234267	name "Candidatus Solibacter usitatus Ellin6076"																				1	taxid 1097668		15	taxid 1097668		625	taxid 1097668		1	taxid 429009
				0.0206	taxaid 310037	name "Acaryochloris sp. CCMEE 5410"		0.449	taxaid 310037	name "Acaryochloris sp. CCMEE 5410"						32	taxid 394221	name "Maricaulis maris MCS10"																				1	taxid 1124961		97	taxid 1124961		733	taxid 1124961		1	taxid 431946
				0.1911	taxaid 310514	name "Prevotella multisaccharivorax"		0.0264	taxaid 310514	name "Prevotella multisaccharivorax"						30	taxid 641892	name "Candidatus Sulcia muelleri DMIN"																				1	taxid 1128398		14	taxid 1128398		153	taxid 1128398		1	taxid 434922
				0.6339	taxaid 313439	name "Streptococcus massiliensis"		0.0861	taxaid 313439	name "Streptococcus massiliensis"						30	taxid 717785	name "Hyphomicrobium sp. MC1"																				1	taxid 1138382		41	taxid 1138382		479	taxid 1138382		1	taxid 438753
				0.0646	taxaid 313589	name "Janibacter sp. HTCC2649"		0.6881	taxaid 313589	name "Janibacter sp. HTCC2649"						28	taxid 317655	name "Sphingopyxis alaskensis RB2256"																				1	taxid 1150469		77	taxid 1150469		905	taxid 1150469		1	taxid 439855
				3.6071	taxaid 314254	name "Oceanicaulis sp. HTCC2633"		0.0375	taxaid 314254	name "Oceanicaulis sp. HTCC2633"						27	taxid 266779	name "Chelativorans sp. BNC1"																				1	taxid 1155096		78	taxid 1155096		602	taxid 1155096		1	taxid 441772
				0.9999	taxaid 327160	name "Candidatus Accumulibacter phosphatis"		0.5602	taxaid 327160	name "Candidatus Accumulibacter phosphatis"																												1	taxid 1155096		71	taxid 1155096		524	taxid 1155096		1	taxid 444612
				0.037	taxaid 335659	name "Bradyrhizobium sp. S23321"		0.2153	taxaid 335659	name "Bradyrhizobium sp. S23321"																												1	taxid 1167006		84	taxid 1167006		2	taxid 1167006		1	taxid 444612
				0.7769	taxaid 34073	name "Variovorax paradoxus"		0.033	taxaid 34073	name "Variovorax paradoxus"																												1	taxid 1170562		78	taxid 1170562		183	taxid 1170562		1	taxid 445932
				0.0063	taxaid 342948	name "Thermococcus onnurineus"		0.0241	taxaid 342948	name "Thermococcus onnurineus"																												1	taxid 1182571		35	taxid 1182571		332	taxid 1182571		1	taxid 445985
				0.0059	taxaid 349106	name "Psychrobacter sp. PRwf-1"		1.0066	taxaid 349106	name "Psychrobacter sp. PRwf-1"																												1	taxid 1194526		82	taxid 1194526		80	taxid 1194526		1	taxid 450851
				0.0104	taxaid 351187	name "Salinispora pacifica"		0.0236	taxaid 351187	name "Salinispora pacifica"																												1	taxid 1194526		99	taxid 1194526		110	taxid 1194526		1	taxid 451515
				2.9559	taxaid 354	name "Azotobacter vinelandii"		0.0036	taxaid 354	name "Azotobacter vinelandii"																												1	taxid 1198114		56	taxid 1198114		594	taxid 1198114		1	taxid 451709
				0.2802	taxaid 35793	name "Rickettsia sibirica"		0.0261	taxaid 35793	name "Rickettsia sibirica"																												1	taxid 1208658		70	taxid 1208658		823	taxid 1208658		1	taxid 454166
				0.028	taxaid 358220	name "Acidovorax sp. KKS102"		0.0202	taxaid 358220	name "Acidovorax sp. KKS102"																												1	taxid 1217737		82	taxid 1217737		850	taxid 1217737		1	taxid 457429
				0.1004	taxaid 363277	name "Ktedonobacter racemifer"		1.6715	taxaid 363277	name "Ktedonobacter racemifer"																												1	taxid 1218355		7	taxid 1218355		23	taxid 1218355		1	taxid 457570
				0.019	taxaid 371731	name "Rhodobacter sp. SW2"		2.5132	taxaid 371731	name "Rhodobacter sp. SW2"																												1	taxid 1223569		16	taxid 1223569		807	taxid 1223569		1	taxid 458233
				1.294	taxaid 372787	name "Fischerella thermalis"		0.5265	taxaid 372787	name "Fischerella thermalis"																												1	taxid 1223569		31	taxid 1223569		931	taxid 1223569		1	taxid 458233
				0.0089	taxaid 37734	name "Enterococcus casseliflavus"		0.1472	taxaid 37734	name "Enterococcus casseliflavus"																												1	taxid 1223570		2	taxid 1223570		454	taxid 1223570		1	taxid 459424
				0.2545	taxaid 38300	name "Streptomyces pristinaespiralis"		1.3527	taxaid 38300	name "Streptomyces pristinaespiralis"																												1	taxid 1223574		99	taxid 1223574		642	taxid 1223574		1	taxid 465515
				0.0065	taxaid 391600	name "Brevundimonas sp. BAL3"		0.008	taxaid 391600	name "Brevundimonas sp. BAL3"																												1	taxid 1224144		21	taxid 1224144		387	taxid 1224144		1	taxid 471472
				0.2832	taxaid 396323	name "Acinetobacter brisouii"		0.0486	taxaid 396323	name "Acinetobacter brisouii"																												1	taxid 1224144		97	taxid 1224144		34	taxid 1224144		1	taxid 471856
				0.0323	taxaid 405212	name "Alicyclobacillus acidocaldarius"		0.0136	taxaid 405212	name "Alicyclobacillus acidocaldarius"																												1	taxid 1224146		43	taxid 1224146		36	taxid 1224146		1	taxid 478433
				0.017	taxaid 40989	name "Saccharomonospora cyanea"		0.0146	taxaid 40989	name "Saccharomonospora cyanea"																												1	taxid 1225785		25	taxid 1225785		164	taxid 1225785		1	taxid 479432
				0.0578	taxaid 424182	name "Rhizobium sp. IRBG74"		0.1794	taxaid 424182	name "Rhizobium sp. IRBG74"																												1	taxid 1225785		89	taxid 1225785		171	taxid 1225785		1	taxid 479433
				0.4993	taxaid 434085	name "gamma proteobacterium IMCC2047"		0.0018	taxaid 434085	name "gamma proteobacterium IMCC2047"																												1	taxid 1225785		27	taxid 1225785		97	taxid 1225785		1	taxid 479435
				0.0283	taxaid 446	name "Legionella pneumophila"		10.0235	taxaid 446	name "Legionella pneumophila"																												1	taxid 1226343		87	taxid 1226343		289	taxid 1226343		1	taxid 479831
				3.3182	taxaid 457393	name "Bacteroides sp. 4_1_36"		0.1902	taxaid 457393	name "Bacteroides sp. 4_1_36"																												1	taxid 1235829		35	taxid 1235829		647	taxid 1235829		1	taxid 479833
				0.0319	taxaid 467661	name "Rhodobacteraceae bacterium KLH11"		0.0074	taxaid 467661	name "Rhodobacteraceae bacterium KLH11"																												1	taxid 1244531		84	taxid 1244531		620	taxid 1244531		1	taxid 479834
				0.1457	taxaid 469598	name "Escherichia sp. 3_2_53FAA"		0.2697	taxaid 469598	name "Escherichia sp. 3_2_53FAA"																												1	taxid 1250520		4	taxid 1250520		35	taxid 1250520		1	taxid 485917
				0.3016	taxaid 487	name "Neisseria meningitidis"		0.1731	taxaid 487	name "Neisseria meningitidis"																												1	taxid 1250520		46	taxid 1250520		155	taxid 1250520		1	taxid 488142
				0.2061	taxaid 490	name "Neisseria sicca"		0.0213	taxaid 490	name "Neisseria sicca"																												1	taxid 1250520		20	taxid 1250520		30	taxid 1250520		1	taxid 497965
				4.7003	taxaid 494419	name "Arthrobacter sp. TB 23"		0.3555	taxaid 494419	name "Arthrobacter sp. TB 23"																												1	taxid 1254439		30	taxid 1254439		313	taxid 1254439		1	taxid 498216
				0.028	taxaid 513050	name "Dictyoglomus turgidum"		5.1429	taxaid 513050	name "Dictyoglomus turgidum"																												1	taxid 1262449		90	taxid 1262449		6	taxid 1262449		1	taxid 499174
				0.0214	taxaid 525244	name "Acinetobacter sp. ATCC 27244"		0.0086	taxaid 525244	name "Acinetobacter sp. ATCC 27244"																												1	taxid 1263832		31	taxid 1263832		232	taxid 1263832		1	taxid 499174
				0.0355	taxaid 545275	name "Thioalkalivibrio sp. ALE20"		0.4336	taxaid 545275	name "Thioalkalivibrio sp. ALE20"																												1	taxid 1281781		91	taxid 1281781		158	taxid 1281781		1	taxid 499175
				0.0445	taxaid 552396	name "Erysipelotrichaceae bacterium 5_2_54FAA"		0.5588	taxaid 552396	name "Erysipelotrichaceae bacterium 5_2_54FAA"																												1	taxid 1293575		27	taxid 1293575		491	taxid 1293575		1	taxid 499175
				0.0018	taxaid 563031	name "Prevotella sp. C561"		0.0272	taxaid 563031	name "Prevotella sp. C561"																												1	taxid 1293576		39	taxid 1293576		288	taxid 1293576		1	taxid 509190
				0.1544	taxaid 590061	name "Halomonas sp. KM-1"		0.0256	taxaid 590061	name "Halomonas sp. KM-1"																												1	taxid 1306418		38	taxid 1306418		796	taxid 1306418		1	taxid 511437
				2.4794	taxaid 621	name "Shigella boydii"		0.1668	taxaid 621	name "Shigella boydii"																												1	taxid 1313292		91	taxid 1313292		818	taxid 1313292		1	taxid 511995
				0.0531	taxaid 630	name "Yersinia enterocolitica"		0.5204	taxaid 630	name "Yersinia enterocolitica"																												1	taxid 1313294		39	taxid 1313294		571	taxid 1313294		1	taxid 521007
				0.1266	taxaid 640510	name "Burkholderia sp. CCGE1001"		1.1969	taxaid 640510	name "Burkholderia sp. CCGE1001"																												1	taxid 1313294		1	taxid 1313294		436	taxid 1313294		1	taxid 521010
				0.2427	taxaid 649724	name "Clostridium sp. ATCC BAA-442"		0.0971	taxaid 649724	name "Clostridium sp. ATCC BAA-442"																												1	taxid 1313294		92	taxid 1313294		979	taxid 1313294		1	taxid 521096
				0.0849	taxaid 654421	name "Anoxybacillus sp. SK3-4"		0.0335	taxaid 654421	name "Anoxybacillus sp. SK3-4"																												1	taxid 1327988		2	taxid 1327988		156	taxid 1327988		1	taxid 521460
				0.05	taxaid 658085	name "Lachnospiraceae bacterium 5_1_57FAA"		0.0007	taxaid 658085	name "Lachnospiraceae bacterium 5_1_57FAA"																												1	taxid 1328311		11	taxid 1328311		512	taxid 1328311		1	taxid 521674
				0.0036	taxaid 667138	name "Thermoplasmatales archaeon I-plasma"		0.0103	taxaid 667138	name "Thermoplasmatales archaeon I-plasma"																												1	taxid 1328314		30	taxid 1328314		931	taxid 1328314		1	taxid 523796
				3.9547	taxaid 66865	name "Streptomyces afghaniensis"		0.1093	taxaid 66865	name "Streptomyces afghaniensis"																												1	taxid 1328324		24	taxid 1328324		621	taxid 1328324		1	taxid 525897
				0.0072	taxaid 673860	name "Aciduliprofundum sp. MAR08-339"		0.0437	taxaid 673860	name "Aciduliprofundum sp. MAR08-339"																												1	taxid 1338411		54	taxid 1338411		926	taxid 1338411		1	taxid 526225
				0.4905	taxaid 68213	name "Streptomyces griseoaurantiacus"		0.0034	taxaid 68213	name "Streptomyces griseoaurantiacus"																												1	taxid 1345710		68	taxid 1345710		249	taxid 1345710		1	taxid 526975
				0.0686	taxaid 68280	name "Streptomyces violaceusniger"		0.0662	taxaid 68280	name "Streptomyces violaceusniger"																												1	taxid 1348623		68	taxid 1348623		280	taxid 1348623		1	taxid 527032
				0.1965	taxaid 68895	name "Cupriavidus basilensis"		0.0351	taxaid 68895	name "Cupriavidus basilensis"																												1	taxid 1354240		23	taxid 1354240		721	taxid 1354240		1	taxid 535026
				0.0244	taxaid 69223	name "Dickeya paradisiaca"		0.1389	taxaid 69223	name "Dickeya paradisiaca"																												1	taxid 1354302		100	taxid 1354302		455	taxid 1354302		1	taxid 535026
				0.0154	taxaid 700750	name "Candidatus Poribacteria sp. WGA-A3"		0.0246	taxaid 700750	name "Candidatus Poribacteria sp. WGA-A3"																												1	taxid 1358410		91	taxid 1358410		515	taxid 1358410		1	taxid 535026
				0.0128	taxaid 712216	name "Capnocytophaga sp. oral taxon 336"		0.0009	taxaid 712216	name "Capnocytophaga sp. oral taxon 336"																												1	taxid 1367477		63	taxid 1367477		218	taxid 1367477		1	taxid 535026
				0.1656	taxaid 742723	name "Lachnospiraceae bacterium 2_1_46FAA"		0.0057	taxaid 742723	name "Lachnospiraceae bacterium 2_1_46FAA"																												1	taxid 1382923		38	taxid 1382923		564	taxid 1382923		1	taxid 535026
				0.0015	taxaid 748280	name "Pseudogulbenkiania sp. NH8B"		0.0091	taxaid 748280	name "Pseudogulbenkiania sp. NH8B"																												1	taxid 1394180		3	taxid 1394180		876	taxid 1394180		1	taxid 535026
				0.3746	taxaid 770	name "Anaplasma marginale"		0.2736	taxaid 770	name "Anaplasma marginale"																												1	taxid 1394180		92	taxid 1394180		182	taxid 1394180		1	taxid 535289
				0.7012	taxaid 79329	name "Chitinophaga pinensis"		0.0032	taxaid 79329	name "Chitinophaga pinensis"																												1	taxid 1412549		48	taxid 1412549		284	taxid 1412549		1	taxid 541229
				0.0124	taxaid 80849	name "Wolbachia endosymbiont of Brugia malayi"		0.3028	taxaid 80849	name "Wolbachia endosymbiont of Brugia malayi"																												1	taxid 1412557		79	taxid 1412557		203	taxid 1412557		1	taxid 543736
				0.252	taxaid 83554	name "Chlamydia psittaci"		0.0317	taxaid 83554	name "Chlamydia psittaci"																												1	taxid 1412843		21	taxid 1412843		169	taxid 1412843		1	taxid 543891
				0.1732	taxaid 911241	name "Pseudomonas sp. CF161"		0.0363	taxaid 911241	name "Pseudomonas sp. CF161"																												1	taxid 1412844		96	taxid 1412844		86	taxid 1412844		1	taxid 547559
				0.0054	taxaid 927677	name "Synechocystis sp. PCC 7509"		1.2722	taxaid 927677	name "Synechocystis sp. PCC 7509"																												1	taxid 1415784		91	taxid 1415784		669	taxid 1415784		1	taxid 552526
				0.5002	taxaid 935543	name "Burkholderia sp. WSM4176"		1.4087	taxaid 935543	name "Burkholderia sp. WSM4176"																												1	taxid 1418105		52	taxid 1418105		649	taxid 1418105		1	taxid 565040
				0.0572	taxaid 939301	name "alpha proteobacterium SCGC AAA015-O19"		0.0019	taxaid 939301	name "alpha proteobacterium SCGC AAA015-O19"																												1	taxid 1420885		60	taxid 1420885		72	taxid 1420885		1	taxid 568707
				0.1457	taxaid 939857	name "Marinimicrobia bacterium SCGC AAA298-D23"		0.0222	taxaid 939857	name "Marinimicrobia bacterium SCGC AAA298-D23"																												1	taxid 1423891		39	taxid 1423891		992	taxid 1423891		1	taxid 570416
				1.4201	taxaid 940615	name "Granulicella tundricola"		0.1083	taxaid 940615	name "Granulicella tundricola"																												1	taxid 1433288		25	taxid 1433288		183	taxid 1433288		1	taxid 572477
				0.6439	taxaid 95609	name "Herbaspirillum sp. B39"		0.0316	taxaid 95609	name "Herbaspirillum sp. B39"																												1	taxid 1435981		4	taxid 1435981		818	taxid 1435981		1	taxid 573065
				0.1941	taxaid 95618	name "Flavobacterium sp. B17"		0.0486	taxaid 95618	name "Flavobacterium sp. B17"																												1	taxid 1437449		30	taxid 1437449		646	taxid 1437449		1	taxid 573825
				0.3404	taxaid 97137	name "Lactobacillus sp. ASF360"		0.001	taxaid 97137	name "Lactobacillus sp. ASF360"																												1	taxid 1484157		60	taxid 1484157		209	taxid 1484157		1	taxid 577650
				0.2173	taxaid 983545	name "Glaciecola sp. 4H-3-7+YE-5"		0.2747	taxaid 983545	name "Glaciecola sp. 4H-3-7+YE-5"																												1	taxid 1505597		1	taxid 1505597		753	taxid 1505597		1	taxid 584708
				0.4816	taxaid 985010	name "Pseudomonas sp. TJI-51"		0.105	taxaid 985010	name "Pseudomonas sp. TJI-51"																												1	taxid 1564114		79	taxid 1564114		856	taxid 1564114		1	taxid 585531
																																						1	taxid 1658672		83	taxid 1658672		831	taxid 1658672		1	taxid 591020
																																															1	taxid 591167
																																															1	taxid 592029
																																															1	taxid 595500
																																															1	taxid 611301
																																															1	taxid 627343
																																															1	taxid 627344
																																															1	taxid 630588
																																															1	taxid 632772
																																															1	taxid 633699
																																															1	taxid 634454
																																															1	taxid 634455
																																															1	taxid 634458
																																															1	taxid 634459
																																															1	taxid 637380
																																															1	taxid 637913
																																															1	taxid 637971
																																															1	taxid 643867
																																															1	taxid 644295
																																															1	taxid 645464
																																															1	taxid 646529
																																															1	taxid 652616
																																															1	taxid 665029
																																															1	taxid 679937
																																															1	taxid 688245
																																															1	taxid 693971
																																															1	taxid 693977
																																															1	taxid 695562
																																															1	taxid 696406
																																															1	taxid 698758
																																															1	taxid 698936
																																															1	taxid 699034
																																															1	taxid 701521
																																															1	taxid 702456
																																															1	taxid 707186
																																															1	taxid 709032
																																															1	taxid 712538
																																															1	taxid 718271
																																															1	taxid 743277
																																															1	taxid 743973
																																															1	taxid 748003
																																															1	taxid 748003
																																															1	taxid 748003
																																															1	taxid 748003
																																															1	taxid 748003
																																															1	taxid 755178
																																															1	taxid 755731
																																															1	taxid 757421
																																															1	taxid 758796
																																															1	taxid 759350
																																															1	taxid 759913
																																															1	taxid 762376
																																															1	taxid 762903
																																															1	taxid 763057
																																															1	taxid 767465
																																															1	taxid 768486
																																															1	taxid 768672
																																															1	taxid 788929
																																															1	taxid 838561
																																															1	taxid 861360
																																															1	taxid 869216
																																															1	taxid 869303
																																															1	taxid 871271
																																															1	taxid 875453
																																															1	taxid 878220
																																															1	taxid 882095
																																															1	taxid 903510
																																															1	taxid 903814
																																															1	taxid 907239
																																															1	taxid 926570
																																															1	taxid 926570
																																															1	taxid 929506
																																															1	taxid 930170
																																															1	taxid 936153
																																															1	taxid 943347
																																															1	taxid 983545
																																															1	taxid 988812
																																															1	taxid 988812
																																															1	taxid 988812
																																															1	taxid 999431
																																															1	taxid 1002809
																																															1	taxid 1004954
																																															1	taxid 1006006
																																															1	taxid 1027396
																																															1	taxid 1037915
																																															1	taxid 1042877
																																															1	taxid 1046629
																																															1	taxid 1048254
																																															1	taxid 1048260
																																															1	taxid 1055527
																																															1	taxid 1064535
																																															1	taxid 1068978
																																															1	taxid 1071761
																																															1	taxid 1071764
																																															1	taxid 1071767
																																															1	taxid 1071770
																																															1	taxid 1071774
																																															1	taxid 1087451
																																															1	taxid 1088719
																																															1	taxid 1088719
																																															1	taxid 1088719
																																															1	taxid 1088719
																																															1	taxid 1088719
																																															1	taxid 1088719
																																															1	taxid 1088719
																																															1	taxid 1088721
																																															1	taxid 1091494
																																															1	taxid 1093099
																																															1	taxid 1094714
																																															1	taxid 1094715
																																															1	taxid 1096996
																																															1	taxid 1096997
																																															1	taxid 1096997
																																															1	taxid 1096997
																																															1	taxid 1097668
																																															1	taxid 1097668
																																															1	taxid 1105110
																																															1	taxid 1105112
																																															1	taxid 1110502
																																															1	taxid 1124936
																																															1	taxid 1124961
																																															1	taxid 1125630
																																															1	taxid 1128398
																																															1	taxid 1138382
																																															1	taxid 1150469
																																															1	taxid 1151116
																																															1	taxid 1155096
																																															1	taxid 1155096
																																															1	taxid 1155096
																																															1	taxid 1166018
																																															1	taxid 1167006
																																															1	taxid 1170562
																																															1	taxid 1173027
																																															1	taxid 1173427
																																															1	taxid 1182571
																																															1	taxid 1183378
																																															1	taxid 1185652
																																															1	taxid 1186051
																																															1	taxid 1193576
																																															1	taxid 1194526
																																															1	taxid 1194526
																																															1	taxid 1198114
																																															1	taxid 1198676
																																															1	taxid 1203460
																																															1	taxid 1203460
																																															1	taxid 1208658
																																															1	taxid 1217737
																																															1	taxid 1218175
																																															1	taxid 1218355
																																															1	taxid 1221522
																																															1	taxid 1223569
																																															1	taxid 1223569
																																															1	taxid 1223569
																																															1	taxid 1223570
																																															1	taxid 1223570
																																															1	taxid 1223570
																																															1	taxid 1223570
																																															1	taxid 1223570
																																															1	taxid 1223570
																																															1	taxid 1223574
																																															1	taxid 1224144
																																															1	taxid 1224144
																																															1	taxid 1224145
																																															1	taxid 1224146
																																															1	taxid 1224154
																																															1	taxid 1225780
																																															1	taxid 1225780
																																															1	taxid 1225785
																																															1	taxid 1225785
																																															1	taxid 1225785
																																															1	taxid 1225785
																																															1	taxid 1225785
																																															1	taxid 1225785
																																															1	taxid 1226343
																																															1	taxid 1229908
																																															1	taxid 1235829
																																															1	taxid 1236903
																																															1	taxid 1244528
																																															1	taxid 1244531
																																															1	taxid 1249475
																																															1	taxid 1249659
																																															1	taxid 1249661
																																															1	taxid 1249665
																																															1	taxid 1249665
																																															1	taxid 1249667
																																															1	taxid 1249668
																																															1	taxid 1250520
																																															1	taxid 1250520
																																															1	taxid 1250520
																																															1	taxid 1250520
																																															1	taxid 1250520
																																															1	taxid 1250520
																																															1	taxid 1250520
																																															1	taxid 1250520
																																															1	taxid 1254439
																																															1	taxid 1262449
																																															1	taxid 1263831
																																															1	taxid 1263832
																																															1	taxid 1268072
																																															1	taxid 1273266
																																															1	taxid 1281282
																																															1	taxid 1281781
																																															1	taxid 1284802
																																															1	taxid 1288313
																																															1	taxid 1292358
																																															1	taxid 1292392
																																															1	taxid 1292392
																																															1	taxid 1292392
																																															1	taxid 1293575
																																															1	taxid 1293575
																																															1	taxid 1293575
																																															1	taxid 1293576
																																															1	taxid 1293576
																																															1	taxid 1293576
																																															1	taxid 1296990
																																															1	taxid 1297582
																																															1	taxid 1303692
																																															1	taxid 1305849
																																															1	taxid 1306418
																																															1	taxid 1311757
																																															1	taxid 1312920
																																															1	taxid 1313291
																																															1	taxid 1313292
																																															1	taxid 1313292
																																															1	taxid 1313292
																																															1	taxid 1313293
																																															1	taxid 1313293
																																															1	taxid 1313294
																																															1	taxid 1313294
																																															1	taxid 1313294
																																															1	taxid 1313294
																																															1	taxid 1313294
																																															1	taxid 1313294
																																															1	taxid 1313294
																																															1	taxid 1313294
																																															1	taxid 1313295
																																															1	taxid 1316444
																																															1	taxid 1321370
																																															1	taxid 1327988
																																															1	taxid 1327988
																																															1	taxid 1328311
																																															1	taxid 1328314
																																															1	taxid 1328324
																																															1	taxid 1333849
																																															1	taxid 1333849
																																															1	taxid 1334632
																																															1	taxid 1335307
																																															1	taxid 1338411
																																															1	taxid 1345710
																																															1	taxid 1346770
																																															1	taxid 1346774
																																															1	taxid 1348584
																																															1	taxid 1348623
																																															1	taxid 1348623
																																															1	taxid 1350461
																																															1	taxid 1354240
																																															1	taxid 1354302
																																															1	taxid 1358410
																																															1	taxid 1367477
																																															1	taxid 1382923
																																															1	taxid 1390363
																																															1	taxid 1394180
																																															1	taxid 1394180
																																															1	taxid 1407063
																																															1	taxid 1407063
																																															1	taxid 1407063
																																															1	taxid 1407064
																																															1	taxid 1412504
																																															1	taxid 1412518
																																															1	taxid 1412528
																																															1	taxid 1412536
																																															1	taxid 1412549
																																															1	taxid 1412557
																																															1	taxid 1412563
																																															1	taxid 1412594
																																															1	taxid 1412607
																																															1	taxid 1412834
																																															1	taxid 1412843
																																															1	taxid 1412843
																																															1	taxid 1412844
																																															1	taxid 1413216
																																															1	taxid 1415629
																																															1	taxid 1415784
																																															1	taxid 1418105
																																															1	taxid 1420885
																																															1	taxid 1423891
																																															1	taxid 1432050
																																															1	taxid 1433288
																																															1	taxid 1435974
																																															1	taxid 1435981
																																															1	taxid 1435981
																																															1	taxid 1437449
																																															1	taxid 1447715
																																															1	taxid 1457195
																																															1	taxid 1457195
																																															1	taxid 1476577
																																															1	taxid 1484157
																																															1	taxid 1484158
																																															1	taxid 1505597
																																															1	taxid 1564114
																																															1	taxid 1658672
[truncated: 4 more columns]
