# Supplementary material for: SLIMM: species level identification of microorganisms from metagenomes
Source: PubMed Central journal article supplement (PMC5372838; doi:10.7717/peerj.3138), 2017-03-28

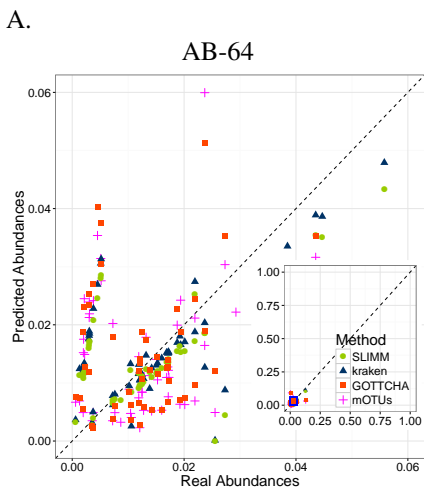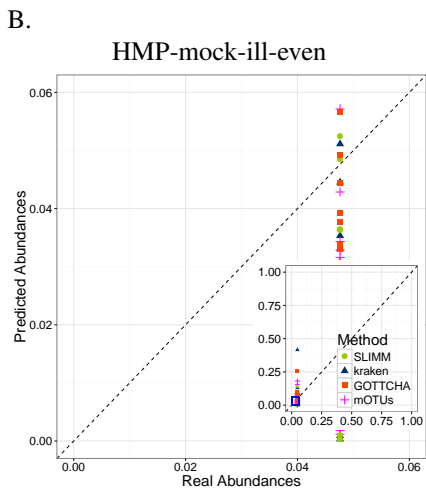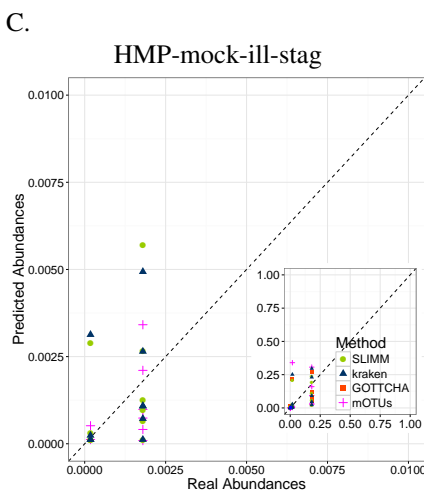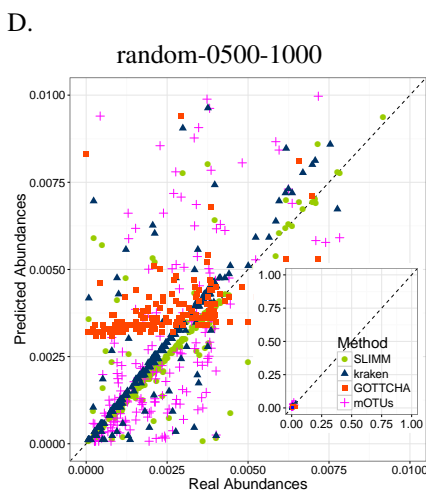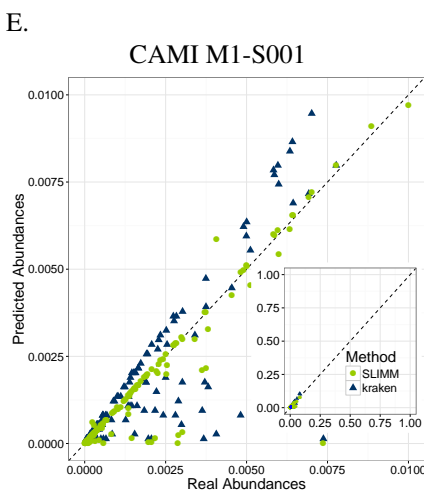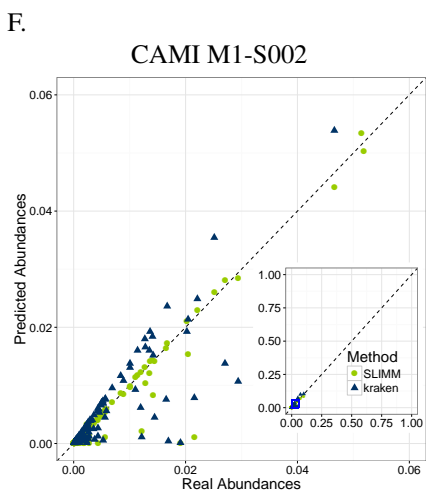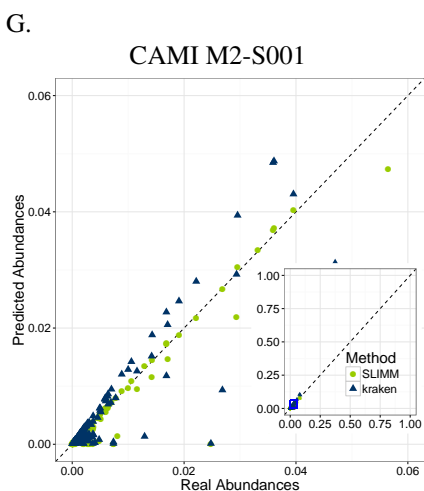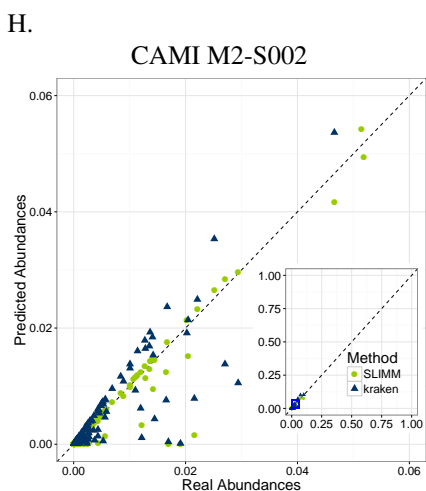

Supplement: peerj-05-3138-s005.pdf [file peerj-05-3138-s005.pdf]
